# Supplementary material
Source: PubMed Central journal article supplement (PMC10411486)
Supplement: NIHMS1895684-supplement-Effects___supplementary_material.pdf [file NIHMS1895684-supplement-Effects___supplementary_material.pdf]

# Effects of Respirators to Reduce Fine Particulate Matter Exposures on Blood Pressure and Heart Rate Variability: A Systematic Review and Meta-Analysis

Sasan Faridi<sup>1#</sup>, Robert D Brook<sup>2#</sup>, Fatemeh Yusefian<sup>3</sup>, Mohammad Sadegh Hassanvand<sup>1,4</sup>, Ramin Nabizadeh Nodehi<sup>1,4</sup>, Mansour Shamsipour<sup>5</sup>, Sanjay Rajagopalan<sup>6</sup>, Kazem Naddafi<sup>1, 4\*</sup>

<sup>1</sup> Center for Air Pollution Research (CAPR), Institute for Environmental Research (IER), Tehran University of Medical Sciences, Tehran, Iran

<sup>2</sup> Wayne State University, Detroit Michigan, USA

<sup>3</sup> Department of Environmental Health Engineering, Faculty of Health, Kashan University of Medical Sciences, Kashan, Iran

<sup>4</sup> Department of Environmental Health Engineering, School of Public Health, Tehran University of Medical Sciences, Tehran, Iran

<sup>5</sup> Department of Research Methodology and Data Analysis, Institute for Environmental Research, Tehran University of Medical Sciences, Tehran, Iran

<sup>6</sup> Case Western Reserve University, Cleveland OH, USA

# Contributed equally.

\* **Corresponding Author:** K. Naddafi, PhD, Department of Environmental Health Engineering, School of Public Health, Tehran University of Medical Sciences, Center for Air Pollution Research (CAPR), Institute for Environmental Research (IER), Tehran University of Medical Sciences, Phone: +98 88978395, Fax: +98 88978397, 8<sup>th</sup> Floor, No. 1547, North Kargar Avenue, Tehran, Iran ([knadafi@tums.ac.ir](mailto:knadafi@tums.ac.ir)).

(1)

N95 (8210 N95  
Respirator, 3M  
Science, MN, United  
States)

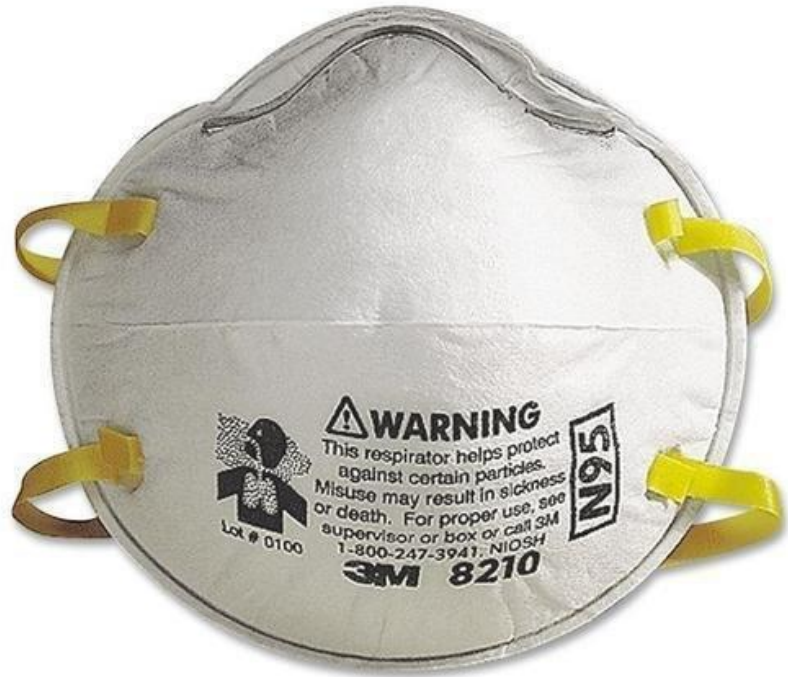

[https://www.3m.com/3M/en\\_US/p/d/v000585997/](https://www.3m.com/3M/en_US/p/d/v000585997/)

(2)

Validated N95  
respirator (a new Dettol  
SiTi shield Protect Plus  
Smart Mask)

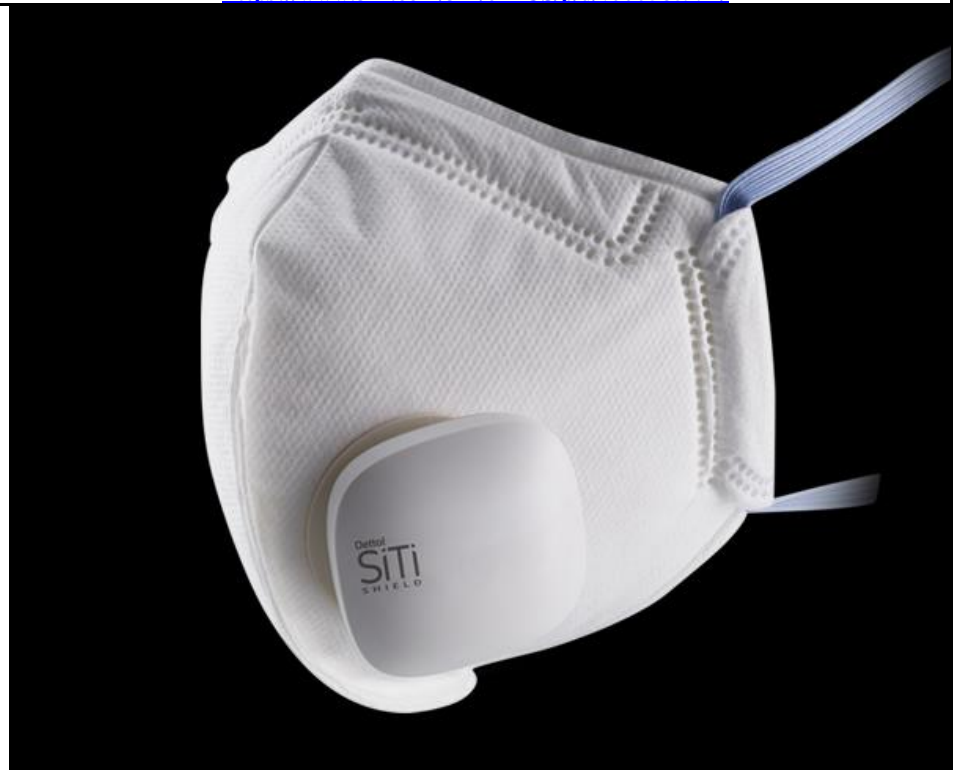

<https://www.dettolsishield.co.in/products/smart-mask/>

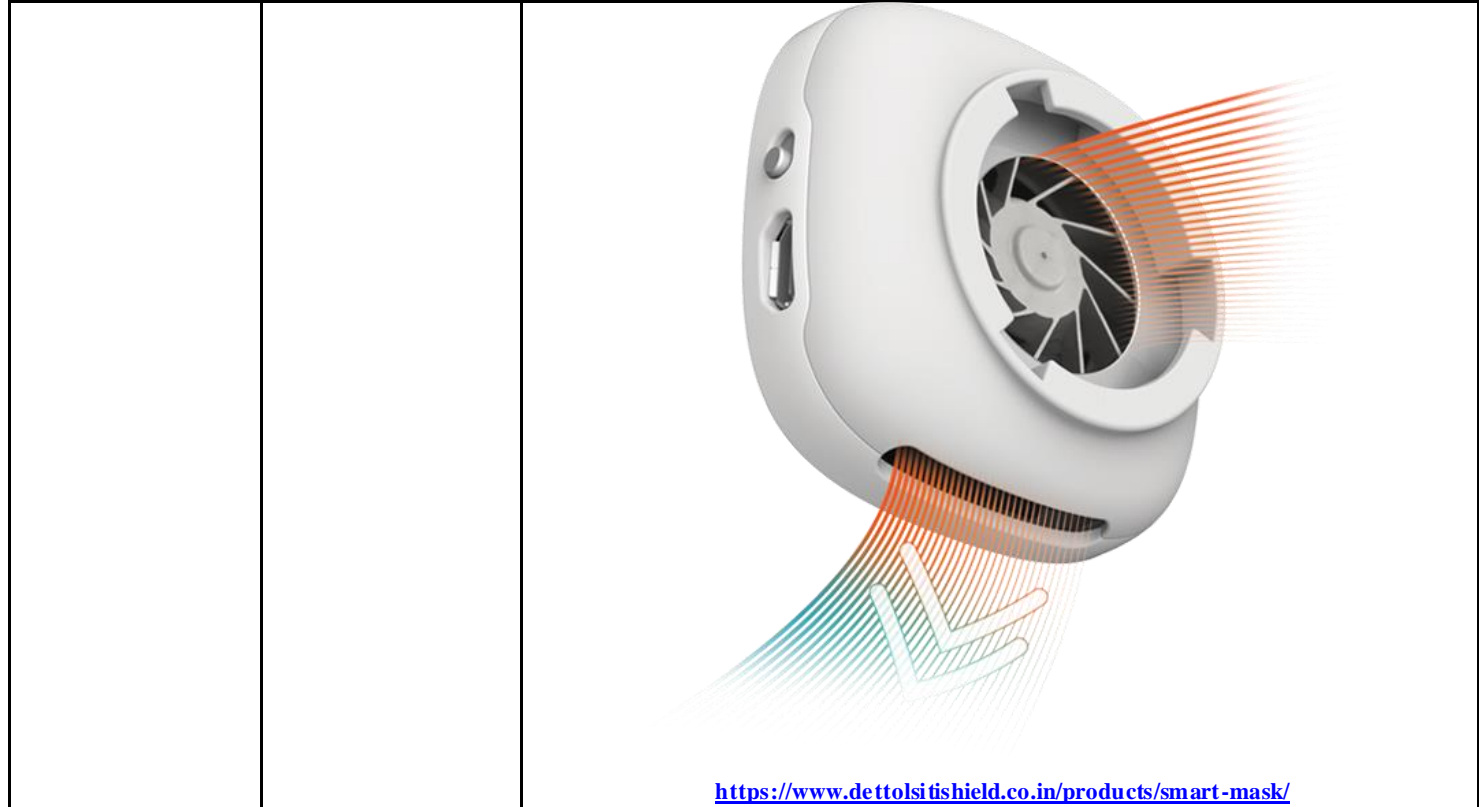

<https://www.dettolshield.co.in/products/smart-mask/>

(3)

3M respirator 9002V

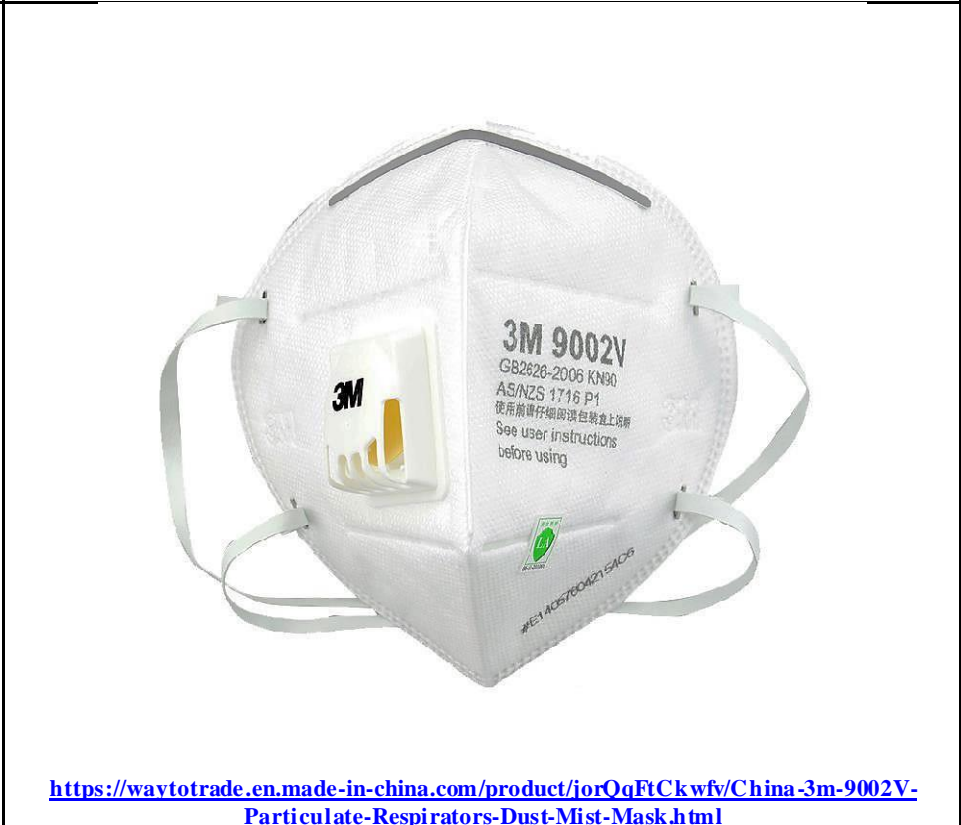

<https://waytotrade.en.made-in-china.com/product/jorQqFtCkfwf/China-3m-9002V-Particulate-Respirators-Dust-Mist-Mask.html>

(4)

Dust Respirator 8812;  
3M, St. Paul, MN,  
USA

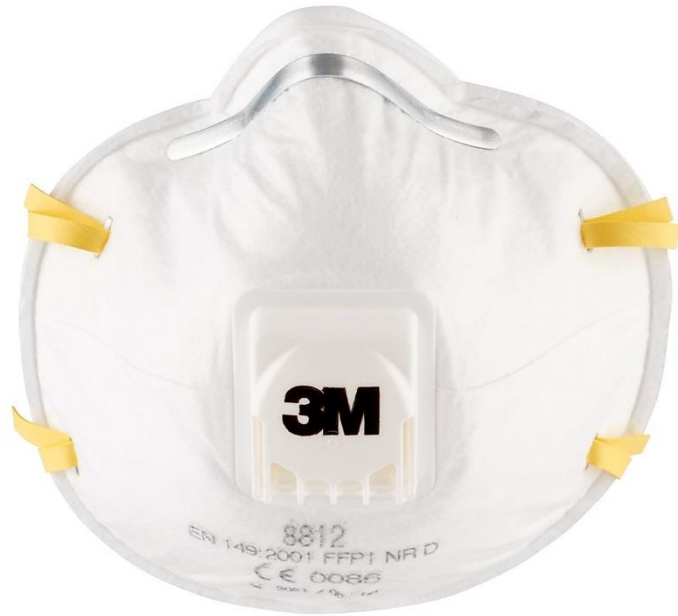

[https://www.3m.com/3M/en\\_LB/p/d/v000061052/](https://www.3m.com/3M/en_LB/p/d/v000061052/)

(5)

Validated N95  
respirator (8210V; 3M)

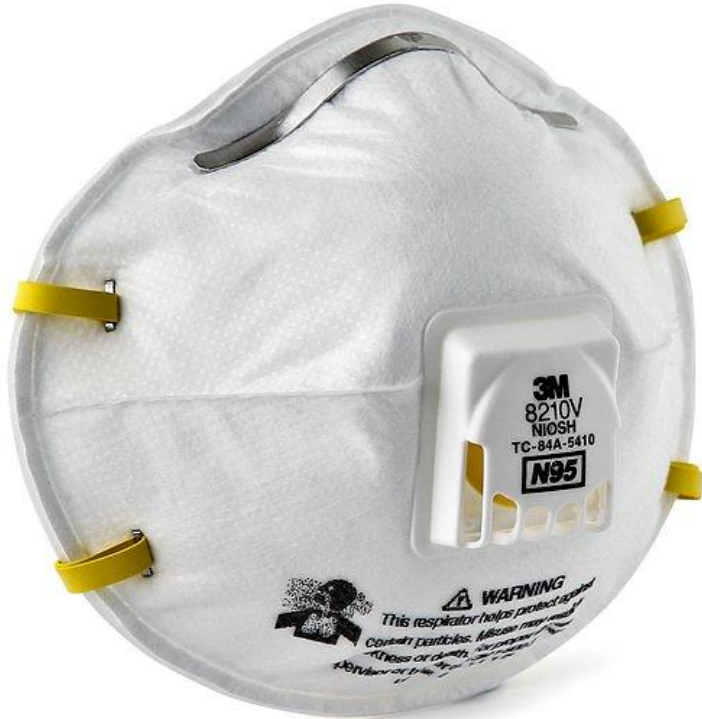

[https://www.3m.com/3M/en\\_US/p/d/v000057815/](https://www.3m.com/3M/en_US/p/d/v000057815/)

|            |                                              |                                                                                                                                                                                                 |
|------------|----------------------------------------------|-------------------------------------------------------------------------------------------------------------------------------------------------------------------------------------------------|
| <p>(6)</p> | <p>Dust Respirator 8812, 3M, St Paul USA</p> |  <p><a href="https://www.3m.com/3M/en_LB/p/d/v000061052/">https://www.3m.com/3M/en_LB/p/d/v000061052/</a></p> |
| <p>(7)</p> | <p>Biomask</p>                               |                                                                                                              |

Reported in the supplementary material of the study of Faridi et al(7).

**Figure S1.** Types of PFRs used by participants in the included studies (Some PFR images have been downloaded from the Internet based on the mentioned commercial brands and their numbers in the included studies).

A

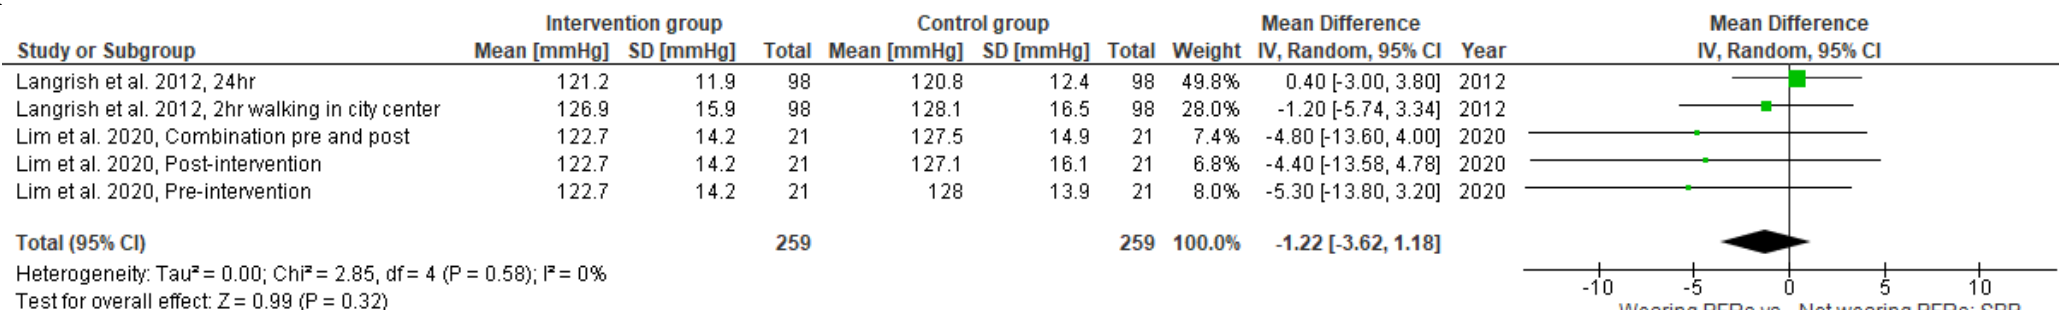

B

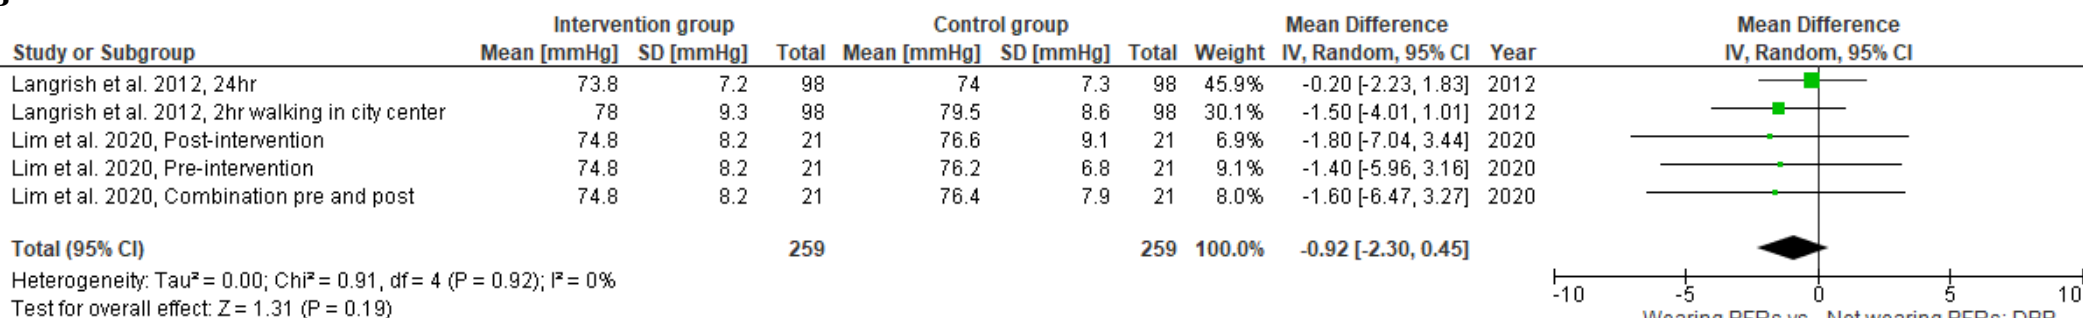

C

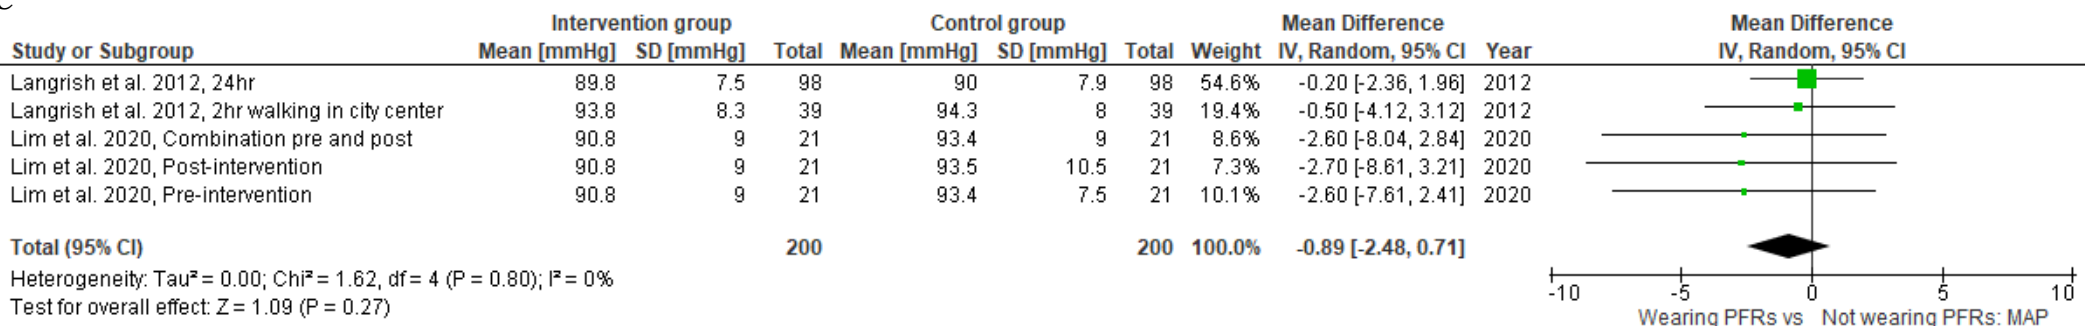

**D**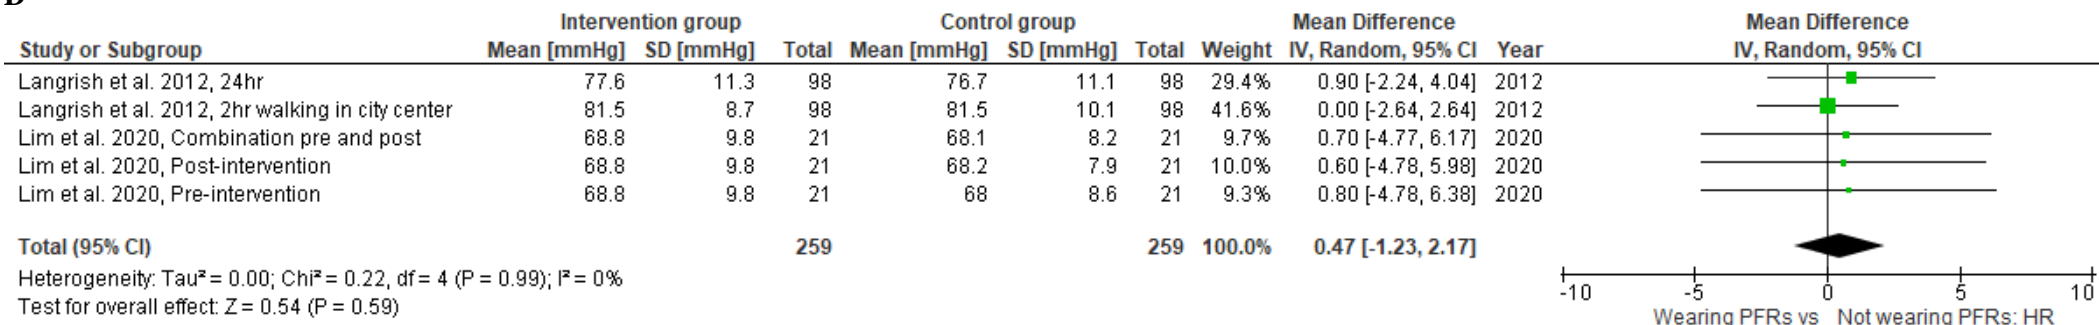

**Figure S2.** Sensitivity analysis of PFRs effect on SBP (A), DBP (B), MAP (C) and HR (D) restricted to studies enrolling aged subjects.

A

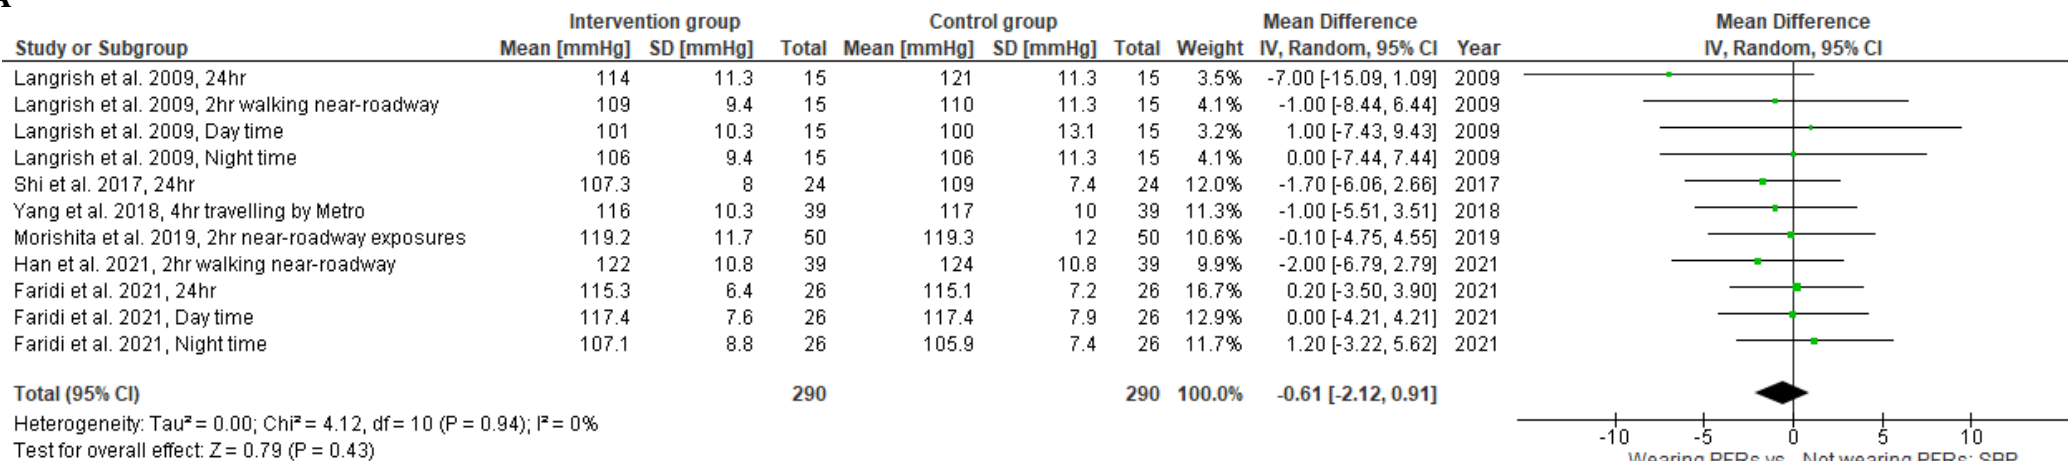

B

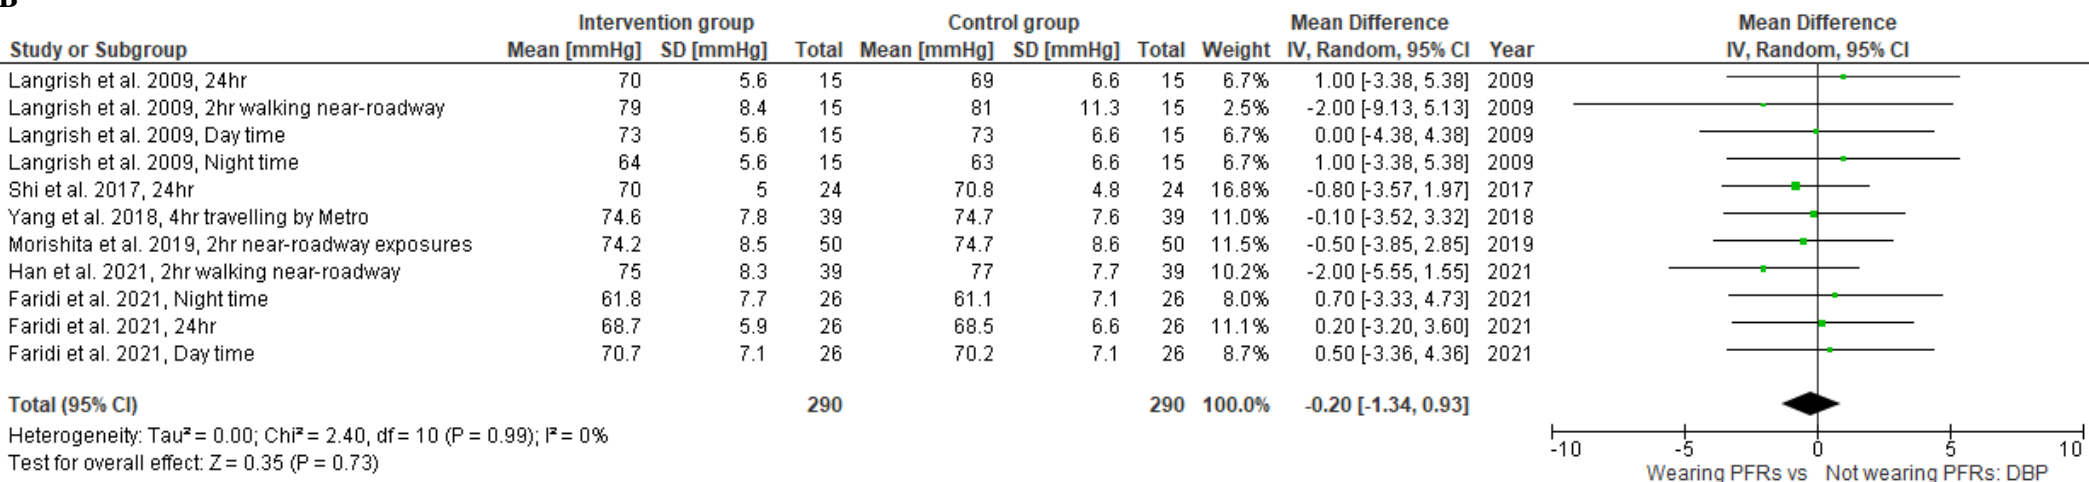



C

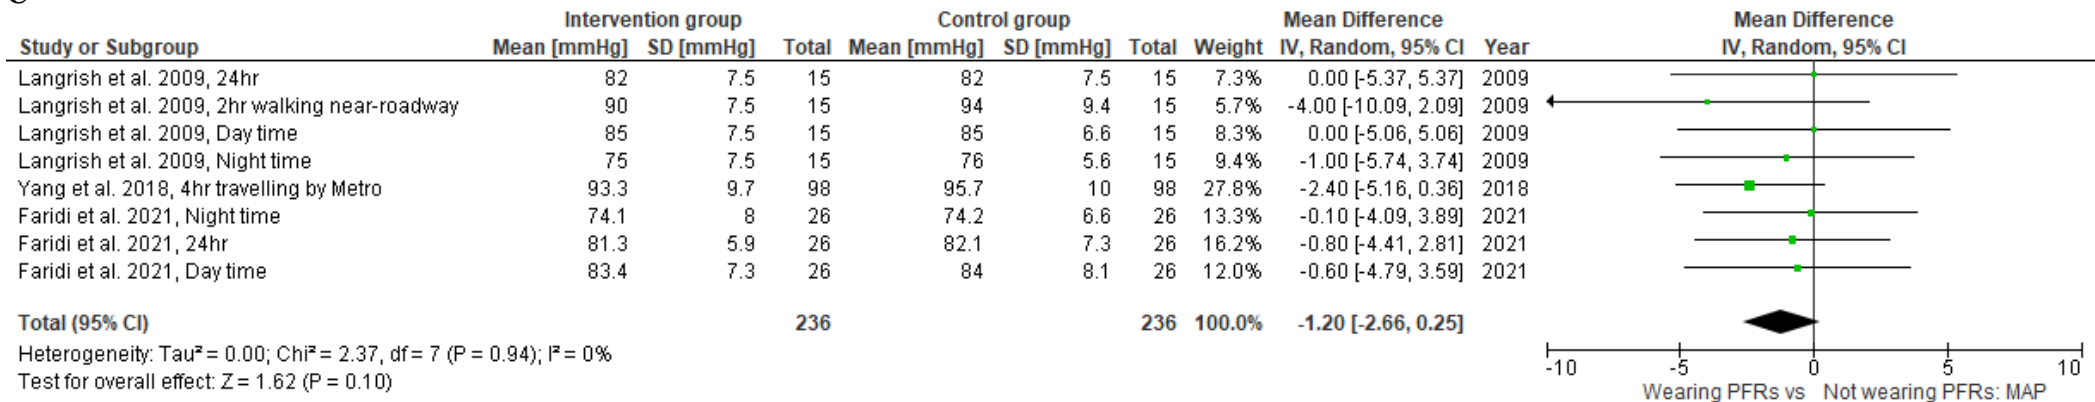

D

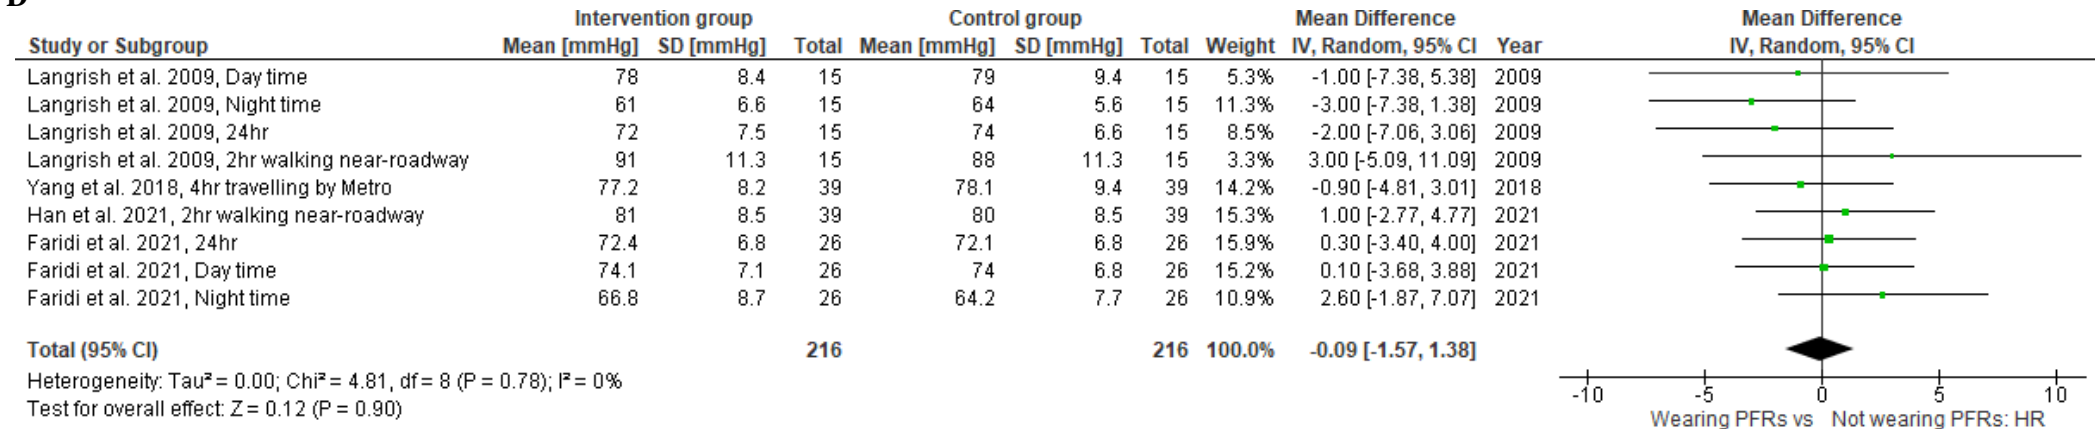

**Figure S3.** Sensitivity analysis of PFRs effect on SBP (A), DBP (B), MAP (C) and HR (D) restricted to studies enrolling younger subjects.

**A**

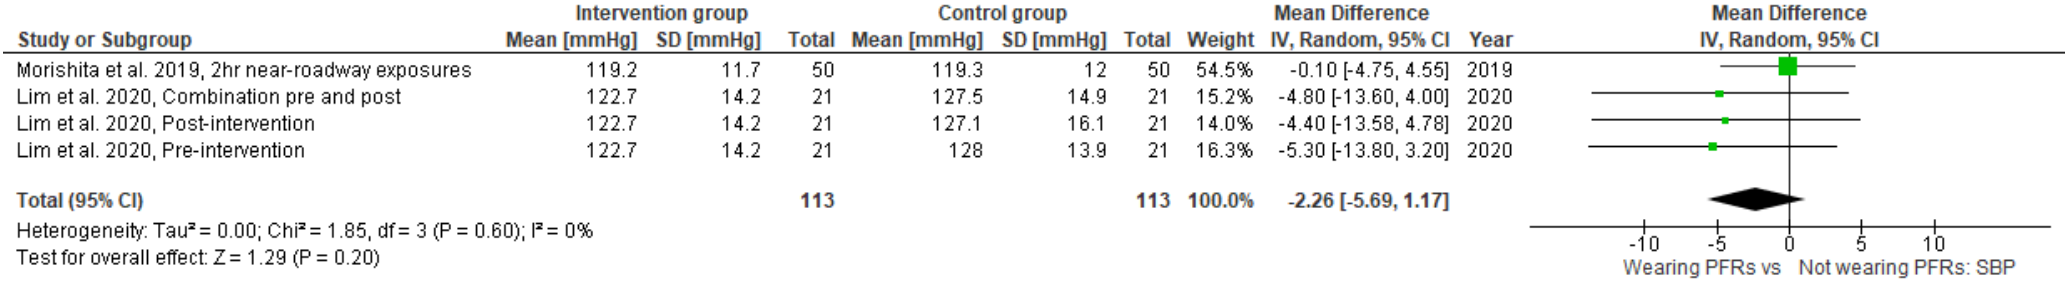

**B**

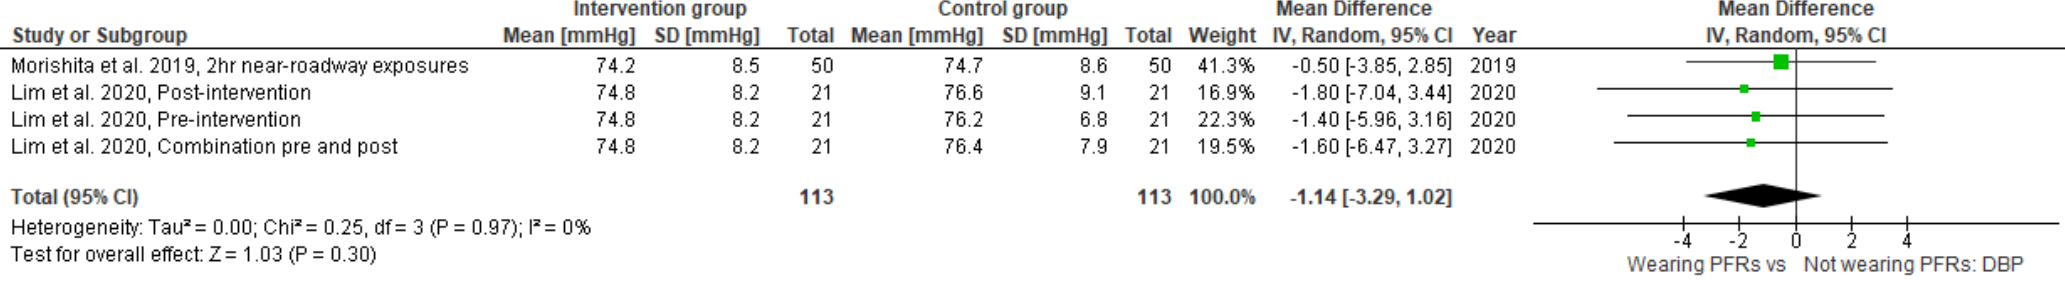

**Figure S4.** Sensitivity analysis of PFRs effect on SBP (A) and DBP (B) restricted to studies with the PM<sub>2.5</sub> levels less than 25 µg/m<sup>3</sup>.

**A**

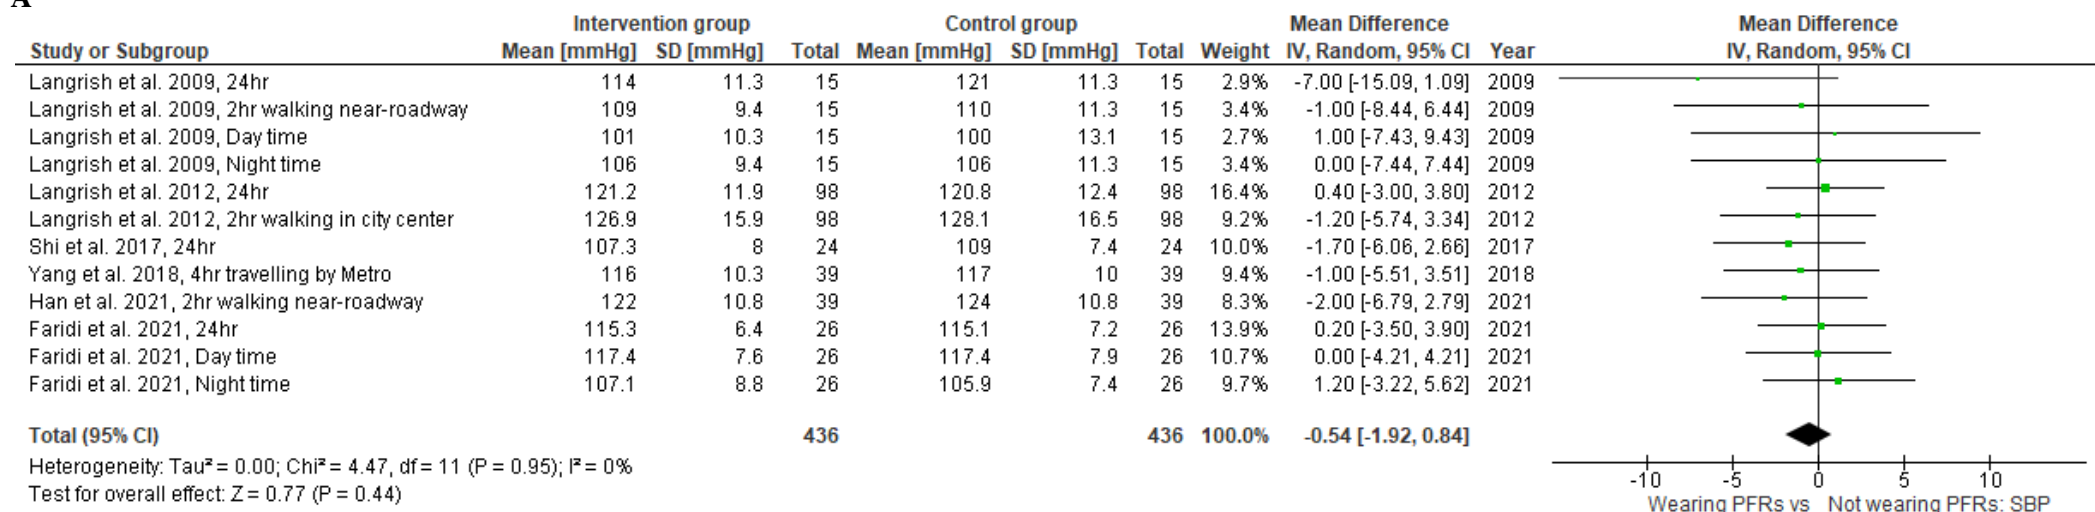

**B**

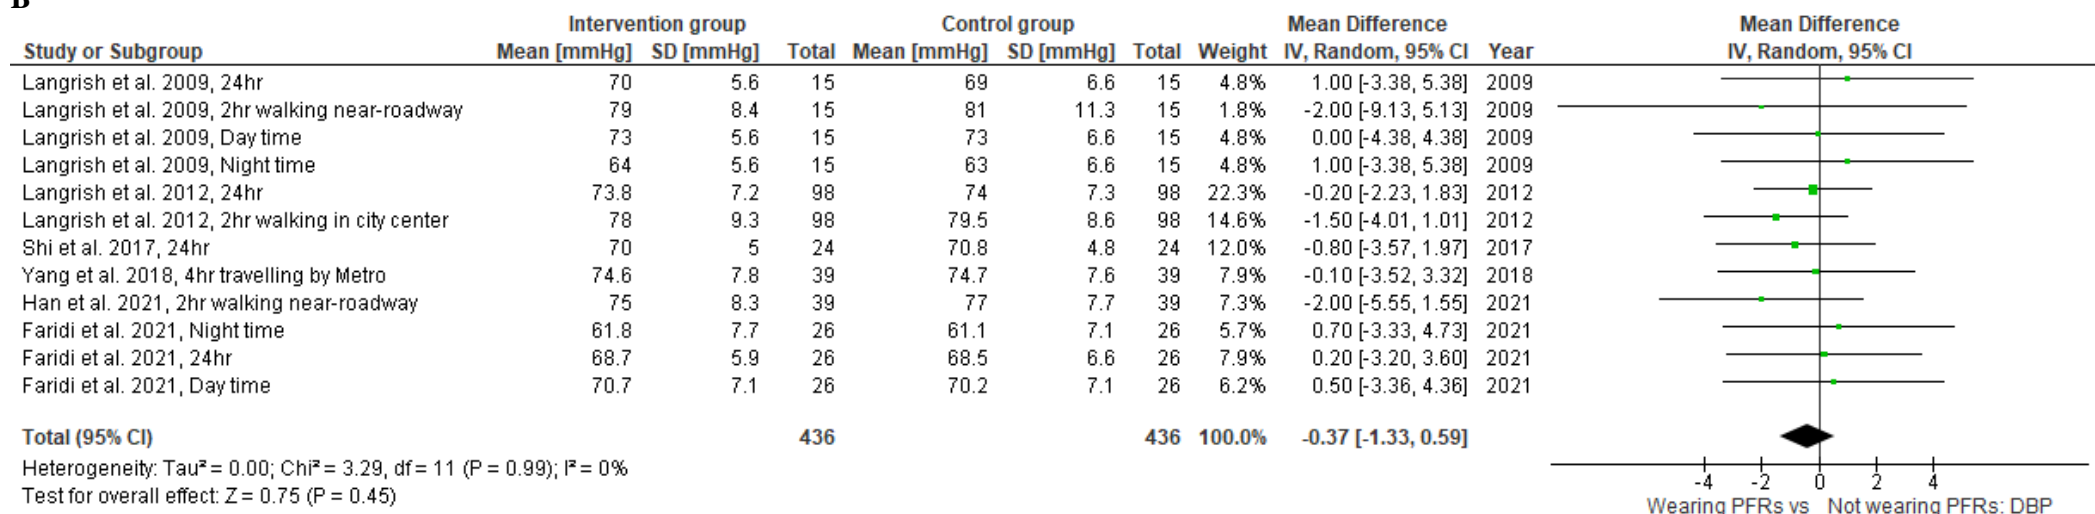

**Figure S5.** Sensitivity analysis of PFRs effect on SBP (A) and DBP (B), restricted to studies with the PM<sub>2.5</sub> levels more than 25 µg/m<sup>3</sup>.

| Study                 | Risk of bias domains |    |    |    |    | Overall |
|-----------------------|----------------------|----|----|----|----|---------|
|                       | D1                   | D2 | D3 | D4 | D5 |         |
| Han et al. 2021       | +                    | +  | +  | +  | +  | +       |
| Faridi et al. 2021    | +                    | -  | -  | +  | +  | -       |
| Lim et al. 2020       | X                    | +  | +  | +  | +  | X       |
| Morishita et al. 2019 | +                    | +  | +  | +  | +  | +       |
| Yang et al. 2018      | +                    | +  | +  | +  | +  | +       |
| Shi et al. 2017       | +                    | +  | +  | +  | +  | +       |
| Langrish et al. 2012  | +                    | +  | +  | +  | +  | +       |
| Langrish et al. 2009  | +                    | +  | +  | +  | +  | +       |

Domains:

- D1: Bias arising from the randomization process.
- D2: Bias due to deviations from intended intervention.
- D3: Bias due to missing outcome data.
- D4: Bias in measurement of the outcome.
- D5: Bias in selection of the reported result.

Judgement

- X High
- Some concerns
- + Low

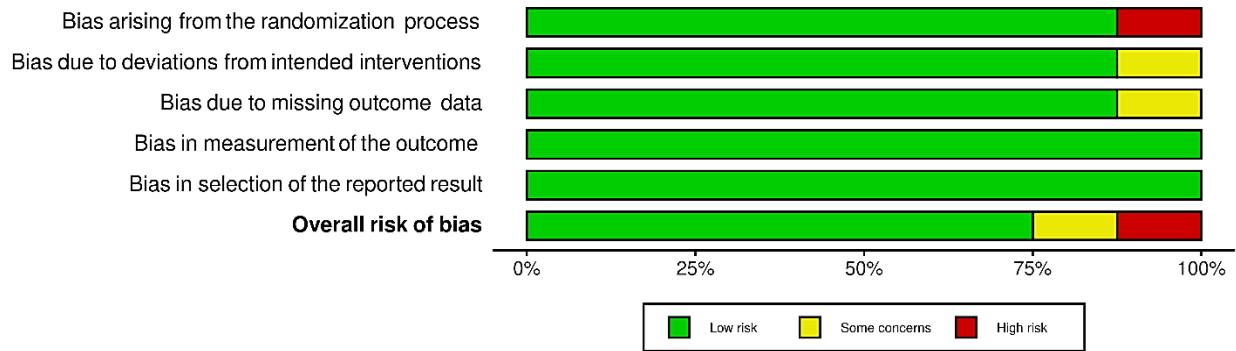

**Figure S6.** Summary of risk of bias for the included studies in our meta-analysis.

**A**

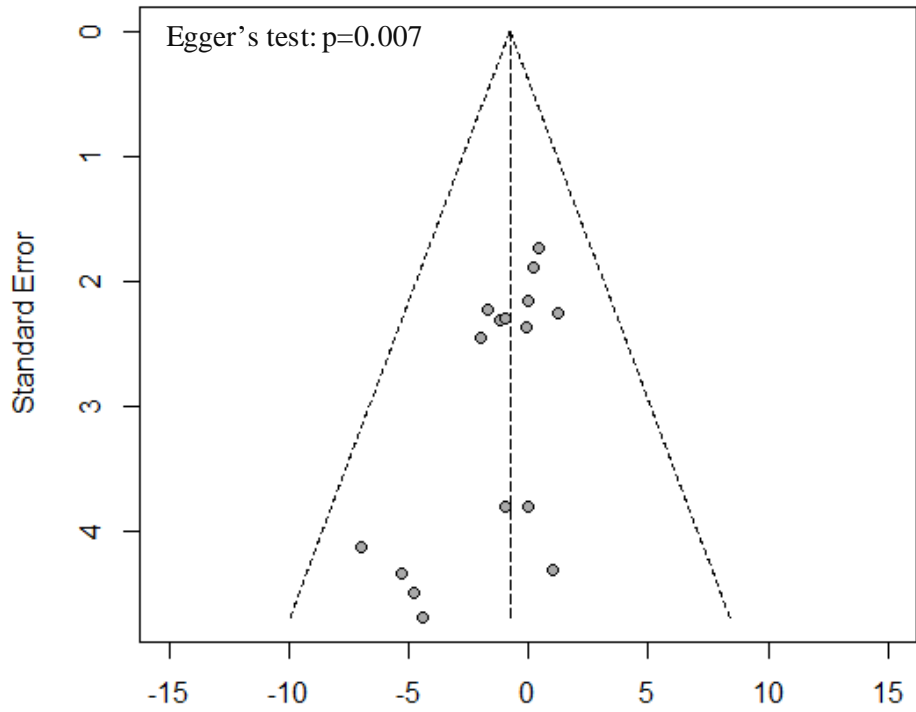

Mean Difference in SBP (mmHg) for wearing PFRs vs not wearing PFRs

**B**

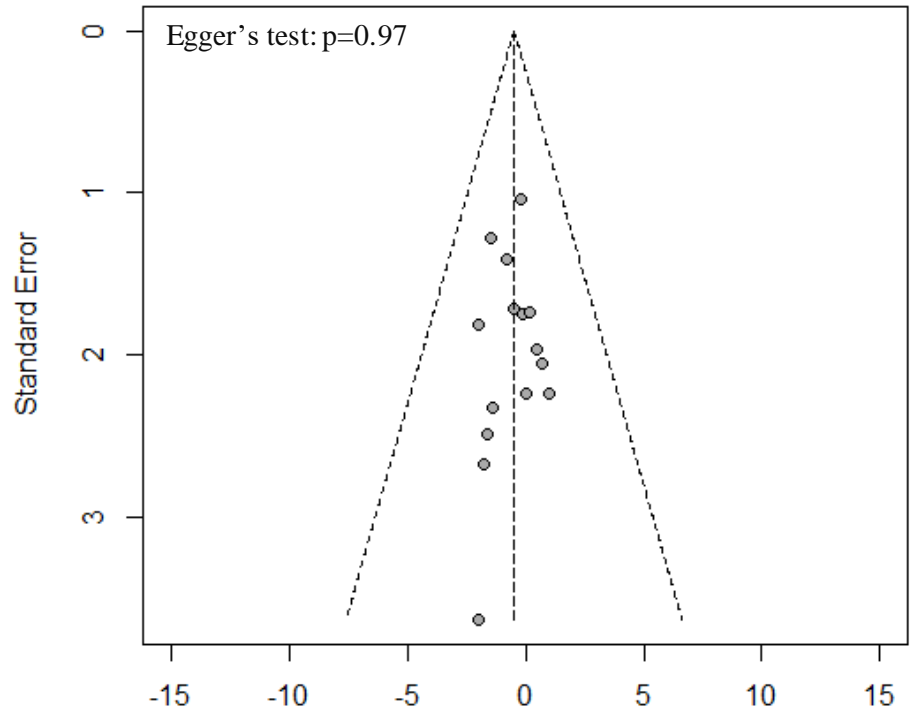

Mean Difference in DBP (mmHg) for wearing PFRs vs not wearing PFRs

**C**

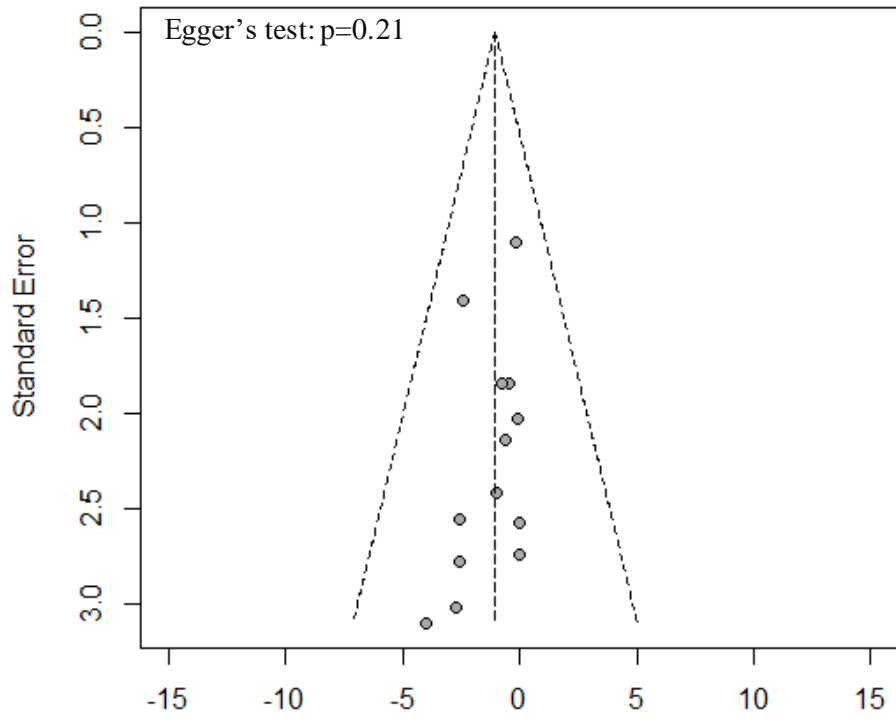

Mean Difference in MAP (mmHg) for wearing PFRs vs not wearing PFRs

**Figure S7.** Begg funnel plots and Egger's test of BP outcomes in our meta-analysis.

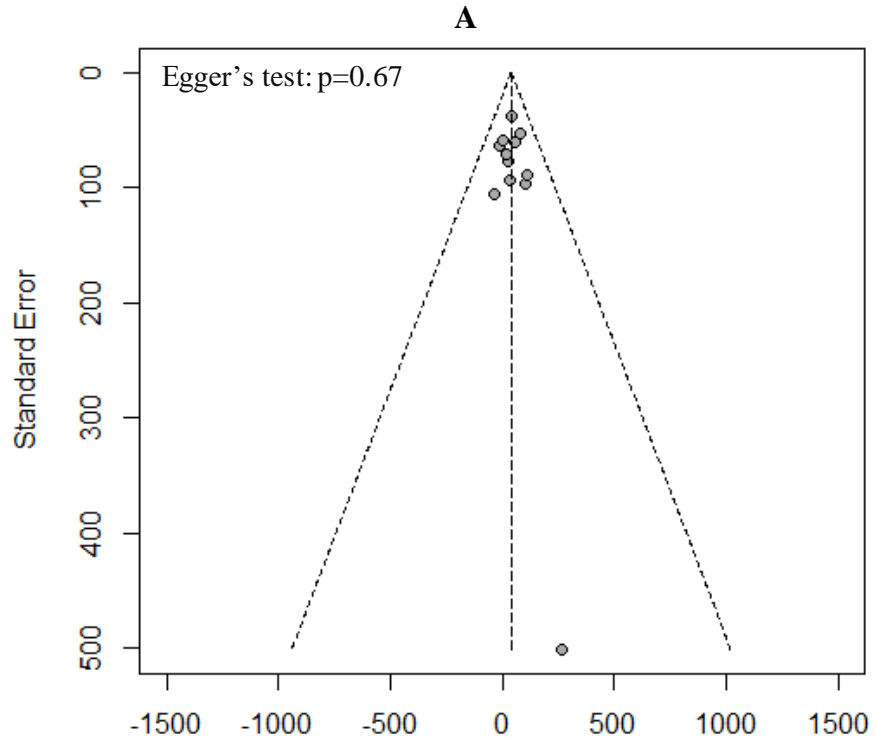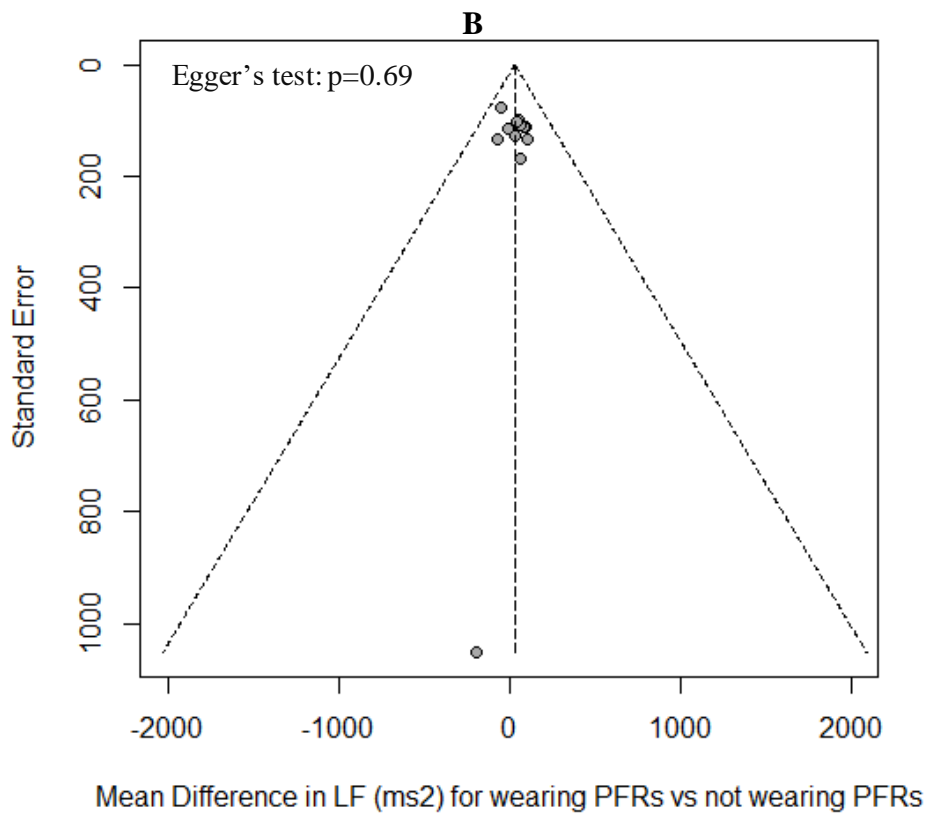

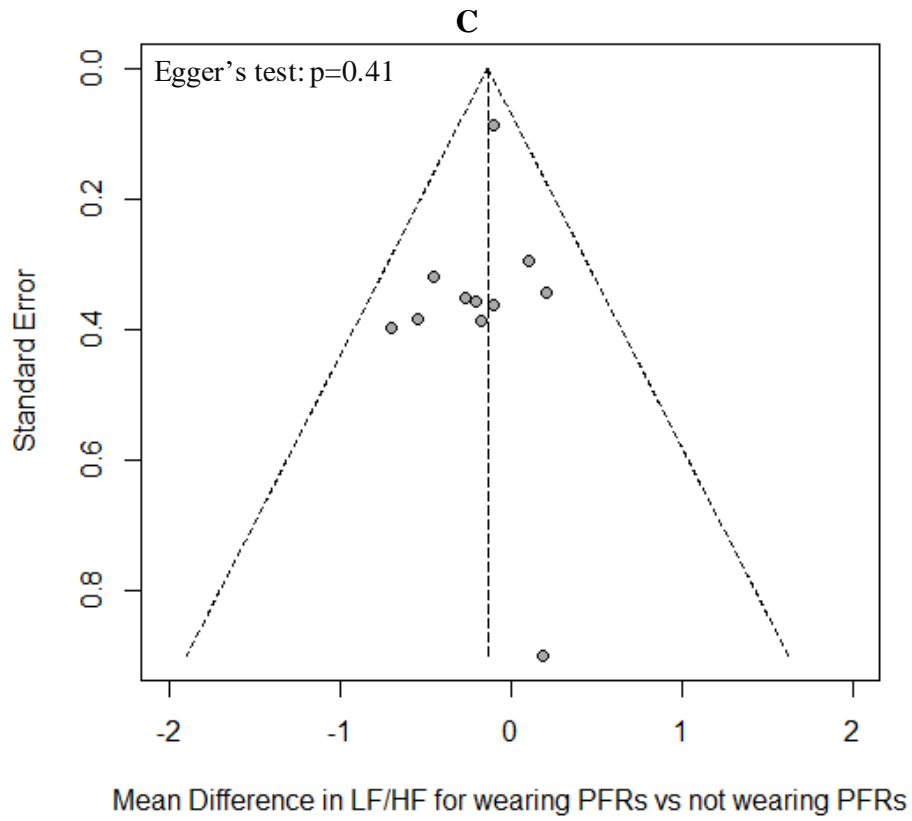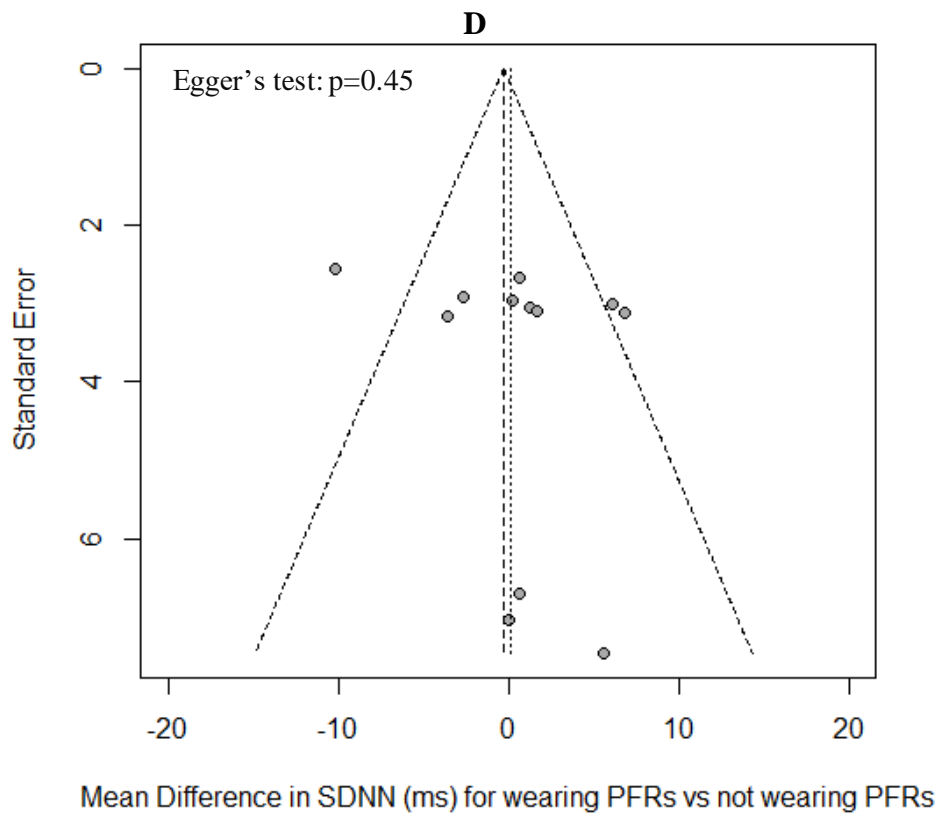



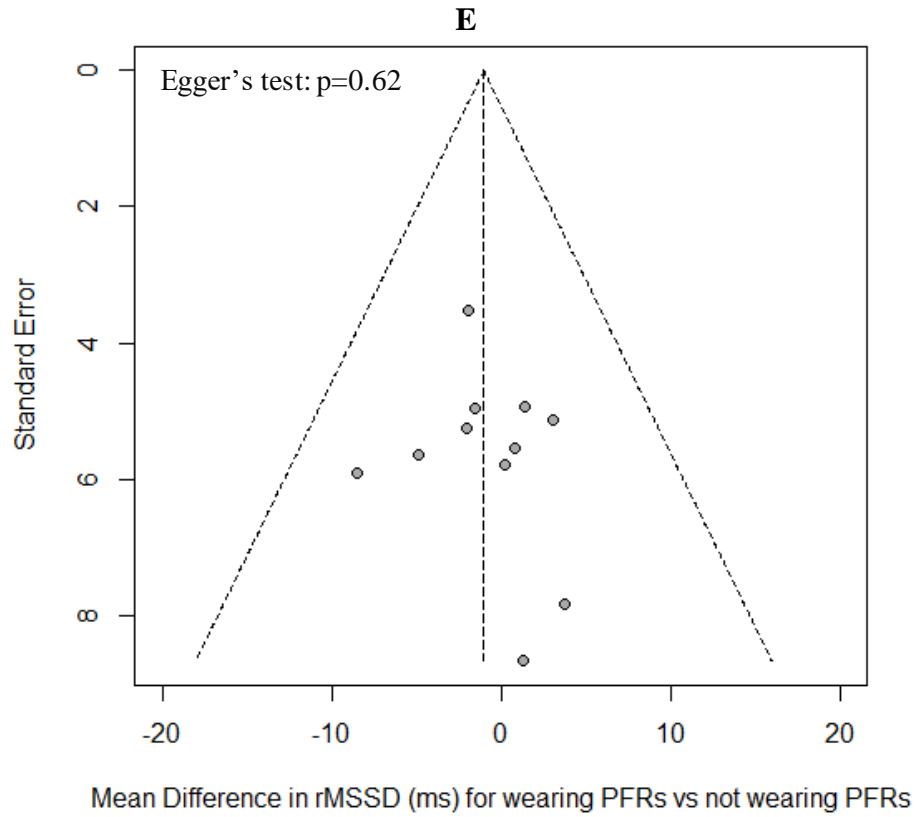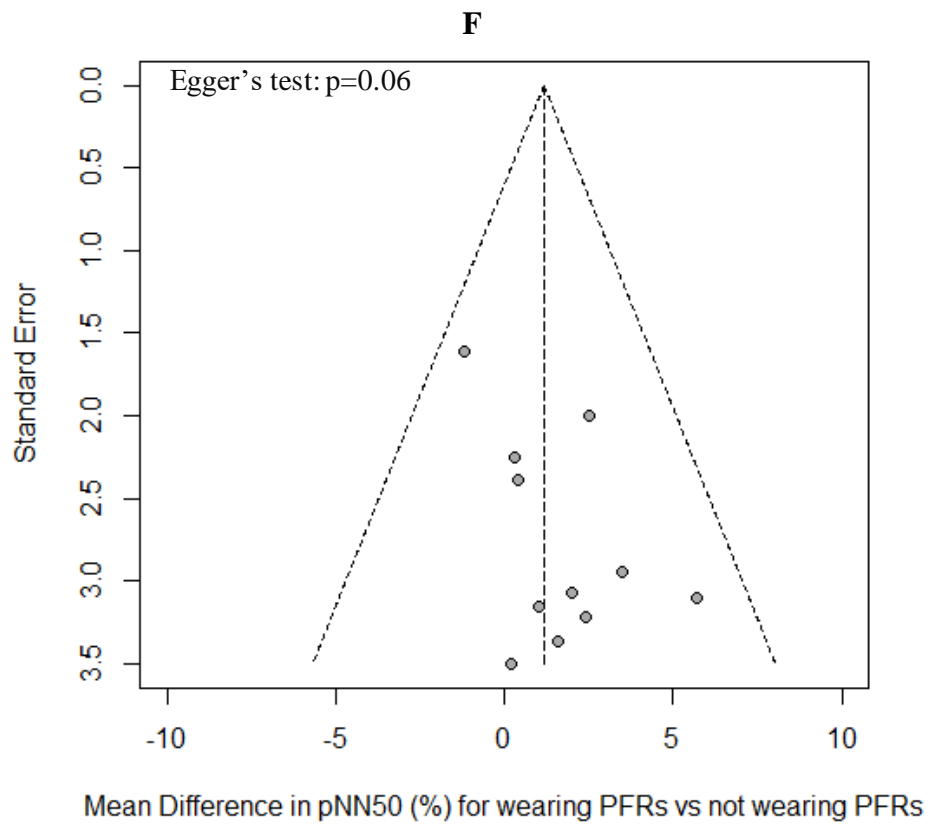

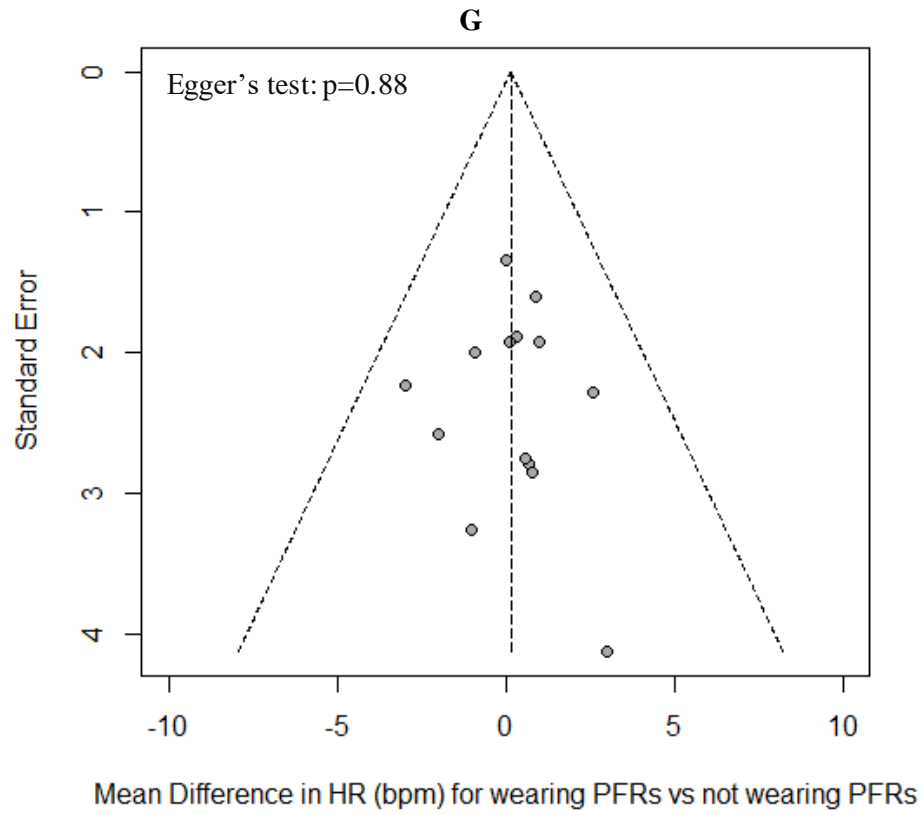

**Figure S8.** Begg funnel plots and Egger's test of HRV indices in our meta-analysis.

**Table S1.** The PICOS (participants, intervention, comparisons, outcomes, and study design) of the meta-analysis and systematic review.

| <b>P: Population</b>                                         | <b>I: Intervention</b>                              |
|--------------------------------------------------------------|-----------------------------------------------------|
| Overall population<br>Elderly<br>Young adults                | Wearing a particulate-filtering respirator          |
| <b>C: Comparison</b>                                         | <b>O: Outcomes</b>                                  |
| Wearing particulate-filtering respirators versus not wearing | Blood Pressure (BP)<br>Heart Rate Variability (HRV) |
| <b>Study design:</b> Randomized crossover study              |                                                     |

**Table S2.** Full search strategy for Scopus, PubMed, and Web of Science.

| Timeline: ~ 03. January. 2022                                                                                                                                                                                                                                                                                                                                                                                                                                                                                                                                                                                                                                                                                                                                                                                                                                                                                                                                                                                                                                                                                                                                                                                                                                                                                                                                                                                                                                                                                                                                                                                                                                                                                                      | Total articles |
|------------------------------------------------------------------------------------------------------------------------------------------------------------------------------------------------------------------------------------------------------------------------------------------------------------------------------------------------------------------------------------------------------------------------------------------------------------------------------------------------------------------------------------------------------------------------------------------------------------------------------------------------------------------------------------------------------------------------------------------------------------------------------------------------------------------------------------------------------------------------------------------------------------------------------------------------------------------------------------------------------------------------------------------------------------------------------------------------------------------------------------------------------------------------------------------------------------------------------------------------------------------------------------------------------------------------------------------------------------------------------------------------------------------------------------------------------------------------------------------------------------------------------------------------------------------------------------------------------------------------------------------------------------------------------------------------------------------------------------|----------------|
| <b>Scopus</b>                                                                                                                                                                                                                                                                                                                                                                                                                                                                                                                                                                                                                                                                                                                                                                                                                                                                                                                                                                                                                                                                                                                                                                                                                                                                                                                                                                                                                                                                                                                                                                                                                                                                                                                      |                |
| <p>(( TITLE-ABS-KEY ( mask* ) OR TITLE-ABS-KEY ( facemask* ) OR TITLE-ABS-KEY ( "face mask*" ) OR TITLE-ABS-KEY ( "particulate-filtering respirator*" ) OR TITLE-ABS-KEY ( "N95 Respirators" ) OR TITLE-ABS-KEY ( respirator* ) OR TITLE-ABS-KEY ( "respiratory protective device" ) OR TITLE-ABS-KEY ( "filtering face piece respirator" ) OR TITLE-ABS-KEY ( "respirator air-purifying" ) OR TITLE-ABS-KEY ( "disposable particulate respirator" ) OR TITLE-ABS-KEY ( n95 ) OR TITLE-ABS-KEY ( n99 ) ) AND ( ( TITLE-ABS-KEY ( "Randomized crossover" ) OR TITLE-ABS-KEY ( "Randomized crossover trials" ) OR TITLE-ABS-KEY ( "RCT*" ) OR TITLE-ABS-KEY ( "Randomized Double-Blind Crossover Trial" ) OR TITLE-ABS-KEY ( "Randomized Single-Blind Crossover Trial" ) OR TITLE-ABS-KEY ( crossover ) ) ) AND ( ( TITLE-ABS-KEY ( cardiovascular ) OR TITLE-ABS-KEY ( cardiopulmonary ) OR TITLE-ABS-KEY ( "blood pressure" ) OR TITLE-ABS-KEY ( sbp ) OR TITLE-ABS-KEY ( dbp ) OR TITLE-ABS-KEY ( "systolic blood pressure" ) OR TITLE-ABS-KEY ( "diastolic blood pressure" ) OR TITLE-ABS-KEY ( "arterial pressure" ) OR TITLE-ABS-KEY ( "aortic blood pressure" ) OR TITLE-ABS-KEY ( hrv ) OR TITLE-ABS-KEY ( "heart rate variability" ) ) ) ) AND ( ( TITLE-ABS-KEY ( "air pollution" ) OR TITLE-ABS-KEY ( "particulate matter" ) OR TITLE-ABS-KEY ( "Ultrafine Particle*" ) OR TITLE-ABS-KEY ( pm2.5 ) OR TITLE-ABS-KEY ( pm10 ) OR TITLE-ABS-KEY ( ufp ) OR TITLE-ABS-KEY ( "PM" ) OR TITLE-ABS-KEY ( "air pollutant*" ) ) )</p>                                                                                                                                                                                             | 196            |
| <b>Web of Science</b>                                                                                                                                                                                                                                                                                                                                                                                                                                                                                                                                                                                                                                                                                                                                                                                                                                                                                                                                                                                                                                                                                                                                                                                                                                                                                                                                                                                                                                                                                                                                                                                                                                                                                                              |                |
| <p>(TS=(mask*) OR TS=(facemask*) OR TS=("face mask*") OR TS=("particulate-filtering respirator*") OR TS=("N95 Respirators") OR TS=(respirator*) OR TS=("respiratory protective device") OR TS=("filtering face piece respirator") OR TS=("respirator air-purifying") OR TS=("disposable particulate respirator") OR TS=(N95) OR TS=(N99)) AND (TS=("Randomized crossover") OR TS=("Randomized crossover trials") OR TS=("Randomized crossover") OR TS=("Randomized crossover trials") OR TS=("RCT*") OR TS=("Randomized Double-Blind Crossover Trial") OR TS=("Randomized Single-Blind Crossover Trial") OR TS=(crossover)) AND (TS=(cardiovascular) OR TS=(cardiopulmonary) OR TS=("blood pressure") OR TS=(SBP) OR TS=(DBP) OR TS=("systolic blood pressure") OR TS=("diastolic blood pressure") OR TS=("arterial pressure") OR TS=("aortic blood pressure") OR TS=(HRV) OR TS=("heart rate variability")) AND (TS=("air pollution") OR TS=("particulate matter") OR TS=("Ultrafine Particle*") OR TS=(PM2.5) OR TS=(PM10) OR TS=(UFP) OR TS=(PM) OR TS=("Air pollutant*")) AND LANGUAGE: (English)</p>                                                                                                                                                                                                                                                                                                                                                                                                                                                                                                                                                                                                                          | 254            |
| <b>PubMed</b>                                                                                                                                                                                                                                                                                                                                                                                                                                                                                                                                                                                                                                                                                                                                                                                                                                                                                                                                                                                                                                                                                                                                                                                                                                                                                                                                                                                                                                                                                                                                                                                                                                                                                                                      |                |
| <p>(((((Mask*[Title/Abstract]) OR (Masks[MeSH Terms])) OR (Facemask*[Title/Abstract]) OR ("face mask*" [Title/Abstract])) OR ("particulate-filtering respirator*" [Title/Abstract])) OR ("N95 Respirators" [Title/Abstract])) OR (Respirator* [Title/Abstract])) OR ("respiratory protective device" [Title/Abstract])) OR ("filtering face piece respirator" [Title/Abstract])) OR ("respirator air-purifying" [Title/Abstract])) OR ("disposable particulate respirator" [Title/Abstract])) OR (N95 [Title/Abstract])) OR (N99 [Title/Abstract])) AND (((("Randomized crossover" [Title/Abstract]) OR ("Randomized crossover trials" [Title/Abstract])) OR (RCT [Title/Abstract])) OR ("Randomized Double-Blind Crossover Trial" [Title/Abstract])) OR ("Randomized Single-Blind Crossover Trial" [Title/Abstract])) OR (crossover [MeSH Terms])) AND (((((((((cardiovascular [Title/Abstract]) OR (cardiopulmonary [Title/Abstract])) OR ("blood pressure" [Title/Abstract])) OR ("blood pressure" [MeSH Terms])) OR (SBP [Title/Abstract])) OR (DBP [Title/Abstract])) OR ("systolic blood pressure" [Title/Abstract])) OR ("diastolic blood pressure" [Title/Abstract])) OR ("arterial pressure" [Title/Abstract])) OR ("aortic blood pressure" [Title/Abstract])) OR (HRV [Title/Abstract])) OR ("heart rate variability" [Title/Abstract])) AND (((((((("air pollution" [MeSH Terms]) OR ("particulate matter" [MeSH Terms])) OR ("air pollution" [Title/Abstract])) OR ("particulate matter" [Title/Abstract])) OR (PM2.5 [Title/Abstract])) OR (PM10 [Title/Abstract])) OR ("PM" [Title/Abstract])) OR ("UFP" [Title/Abstract])) OR ("Ultrafine Particle*" [Title/Abstract])) OR ("air pollutant*" [Title/Abstract]))</p> | 77             |

**Table S3.** Particulate matter air pollution levels ( $\mu\text{g}/\text{m}^3$ ) during the intervention periods in the included studies.

| Study | Interventions                                    | PM <sub>2.5</sub> : Ave $\pm$ SD (Min-Max) | PM <sub>10</sub> : Ave $\pm$ SD (Min-Max) |
|-------|--------------------------------------------------|--------------------------------------------|-------------------------------------------|
| (7)‡  | First 48-h intervention period                   | 71.0                                       | 134.0                                     |
|       | Second 48-h intervention period                  | 56.8                                       | 105.6                                     |
| (8)   | Pre-intervention period                          | 23.6 $\pm$ 3.5                             | -                                         |
|       | Post-intervention period                         | 18.8 $\pm$ 5.4                             | -                                         |
|       | Combination of pre- and post-intervention period | 21.2 $\pm$ 5.1                             | -                                         |
|       | Intervention period                              | 15.9 $\pm$ 5.5                             | -                                         |
| (2)   | Without PFR                                      | 9.3 $\pm$ 7.8                              | -                                         |
|       | With PFR                                         | 9.2 $\pm$ 7.6                              | -                                         |
| (3)*  | Without PFR                                      | 79.6 (60.6 – 95.1)                         | 205 (165-235)                             |
|       | With PFR                                         | 72.9 (56.5 – 79.7)                         | 176 (142-200)                             |
| (5)*  | Outdoor                                          | 74.2 $\pm$ 38.3                            | -                                         |
|       | Indoor                                           | 85.2 $\pm$ 43.6                            | -                                         |
| (4)   | Without PFR                                      | 89 (25 – 170)                              | 92 (70-117)                               |
|       | With PFR                                         | 61 (20 – 88)                               | 103 (83-180)                              |
| (6)   | Without PFR                                      | 86 $\pm$ 61 (52 – 120)                     | -                                         |
|       | With PFR                                         | 140 $\pm$ 113 (77 – 203)                   | -                                         |
| (1)   | Without PFR                                      | -                                          | -                                         |
|       | With PFR                                         | -                                          | -                                         |

‡ In this study, indoor particulate matter concentrations have been reported at first (half of participants wore PFR and the others did not wear PFR) and second (half of participants wore PFR and the others did not wear PFR) intervention periods.

\*Median (percentile 25-percentile 75).

\* Considering the particulate-filtration efficiency of the respirator and the proportion of wearing time, the estimated time-weighted exposure levels of PM<sub>2.5</sub> for subjects wearing respirators were 7.1  $\mu\text{g}/\text{m}^3$  outdoors and 19.3  $\mu\text{g}/\text{m}^3$  indoors on average.

**Table S4.** Details regarding BP measurement protocol.

| Study | BP measurement device                                                                                                          | BP measurement (Ambulatory vs Seated) | Where was BP measurement device installed? | How often was BP measurement repeated during the study period?                       | Number of BP measurements (included to analyses)                                                                                                                                    | Which study has considered BP as the primary outcome? |
|-------|--------------------------------------------------------------------------------------------------------------------------------|---------------------------------------|--------------------------------------------|--------------------------------------------------------------------------------------|-------------------------------------------------------------------------------------------------------------------------------------------------------------------------------------|-------------------------------------------------------|
| (1)   | Automated blood pressure cuff and monitor: Oscar 2, SunTech Medical, Inc., NY, USA                                             | Ambulatory                            | NR                                         | Every 15 min                                                                         | NR (Computed based on the duration of intervention and control periods: 38 measurements per each participant).                                                                      | NR (not reported)                                     |
| (7)   | NR                                                                                                                             | Ambulatory                            | Left upper-arm                             | Every 30 min during the day (8:00–22:00)<br>Every hour during the night (22:00–7:00) | NR (Computed based on the duration of intervention and control periods: 56 measurements per each participants for the day and 36 measurements per each participants for the night). | *                                                     |
| (8)   | automatic sphygmomanometer (HEM-780; Omron, Kyoto, Japan)                                                                      | Seated                                | At the arm                                 | Every 10 min                                                                         | two measurements of BP were obtained with a 10-minute interval.                                                                                                                     | NR                                                    |
| (2)   | Ambulatory blood pressure monitoring: OSCAR-2 BP monitor with SphygmoCorinside and the XCEL PWA system (Atcor Medical, Sydney) | Seated                                | NR                                         | Every 10 min                                                                         | Average of 9 readings per participant each visit (4 visits out of 5 visits)                                                                                                         | *                                                     |
| (3)   | A portable device: Mobile-O-GEAPH NG Vers.20; Hypertension Management Software Inc. Germany                                    | Ambulatory                            | Over the left brachial artery              | Every 15 min                                                                         | NR (Computed based on the duration of intervention and control periods: 32 measurements per each participant).                                                                      | NR                                                    |
| (5)   | A portable, noninvasive, automated ambulatory BP monitoring and recording                                                      | Ambulatory                            | Over the left brachial artery              | Every 15 min (6:00–22:00) and every 30 min (22:00–6:00)                              | At least 60 measurements (out of the total 80)                                                                                                                                      | NR                                                    |

| Study | BP measurement device                                                                                            | BP measurement (Ambulatory vs Seated) | Where was BP measurement device installed? | How often was BP measurement repeated during the study period?                                                                                      | Number of BP measurements (included to analyses)                                                                                                                                                     | Which study has considered BP as the primary outcome? |
|-------|------------------------------------------------------------------------------------------------------------------|---------------------------------------|--------------------------------------------|-----------------------------------------------------------------------------------------------------------------------------------------------------|------------------------------------------------------------------------------------------------------------------------------------------------------------------------------------------------------|-------------------------------------------------------|
|       | instrument (Model 90217, Spacelabs, UK)                                                                          |                                       |                                            |                                                                                                                                                     | measurements) were considered effective monitoring of the BP.                                                                                                                                        |                                                       |
| (6)   | An automatic blood pressure monitor (Model 90217, Spacelabs, UK)                                                 | Ambulatory                            | At the left brachial artery                | Every 15 minutes during the 2-hour walking<br>Every 30 minutes for the rest of the daytime (07:00 to 22:00)<br>Every hour overnight (22:00 – 07:00) | NR (Computed based on the duration of intervention and control periods: 16, 30 and 18 measurements per each participant during 2-hour walking, the rest of the daytime and overnight, respectively). | NR                                                    |
| (4)   | An automatic blood pressure (model 90217 ultralite ambulatory blood pressure monitor; Spacelabs Healthcare Ltd.) | Ambulatory                            | NR                                         | Every 15 min during the 2-hr walking<br>Every 30 min during the day<br>Every hour overnight (22:00 hours to 07:00 hours)                            | NR (Computed based on the duration of intervention and control periods: 16, 30 and 18 measurements per each participant during 2-hour walking, the rest of the daytime and overnight, respectively). | NR                                                    |

\* These studies have reported that BP as primary outcomes.

**Table S5.** Details regarding HRV measurement protocol.

| Study | HRV measurement device                                                                                              | How did the HRV indices monitor (Ambulatory or Seated)? |
|-------|---------------------------------------------------------------------------------------------------------------------|---------------------------------------------------------|
| (1)   | 12-lead Holter monitor (BI9800, Biomedical Instruments Co. Ltd, Shenzhen, China)                                    | Ambulatory                                              |
| (7)   | 12-lead continuous electrographic Holter                                                                            | Ambulatory                                              |
| (2)   | Continuous electrocardiogram monitoring using a Spacelabs evo Holter system                                         | Seated                                                  |
| (3)   | 12-channel continuous Holter recorder (model MGY-H12; DM Software Inc., USA)                                        | Ambulatory                                              |
| (5)   | 12-lead continuous electrographic Holter monitor (Seer Light, GE Medical Systems)                                   | Ambulatory                                              |
| (4)   | 12-lead continuous electrocardiography (ECG) Holter recorder (Lifecard 12; Spacelabs Healthcare Ltd., Hertford, UK) | Ambulatory                                              |
| (6)   | 12-lead continuous electrographic Holter monitor (Lifecard 12, Spacelabs, UK)                                       | Ambulatory                                              |
| (8)   | Not reported                                                                                                        | Ambulatory                                              |

**Table S6.** Comparing the findings of the participants wore respirators for 24 and 48 hour versus those wore respirators for 2 and 4 hour.

| Health outcomes based on the time duration of wearing respirators (studies) | Heterogeneity    |                  |                |         | Test for overall effect  |      |         |
|-----------------------------------------------------------------------------|------------------|------------------|----------------|---------|--------------------------|------|---------|
|                                                                             | Tau <sup>2</sup> | Chi <sup>2</sup> | I <sup>2</sup> | p-value | Overall effect size      | Z    | p-value |
| <b>SBP-24 and 48 hour</b> (4, 5, 7, 9)                                      | 0.00             | 6.80             | 0%             | 0.87    | -0.71 (-2.17, 0.74)      | 0.96 | 0.34    |
| <b>SBP-2 and 4 hour</b> (1-3)                                               | 0.00             | 0.31             | 0%             | 0.86    | -1.01 (-3.69, 1.67)      | 0.74 | 0.46    |
| <b>DBP-24 and 48 hour</b> (4, 5, 7, 9)                                      | 0.00             | 3.17             | 0%             | 0.99    | -0.41 (-1.39, 0.56)      | 0.83 | 0.41    |
| <b>DBP-2 and 4 hour</b> (1-3)                                               | 0.00             | 0.63             | 0%             | 0.73    | -0.83 (-2.82, 1.15)      | 0.82 | 0.41    |
| <b>HF-24 and 48 hour</b> (5, 7, 9)                                          | 0.00             | 2.78             | 0%             | 0.95    | 36.46 (-3.95, 76.86)     | 1.77 | 0.08    |
| <b>HF-2 and 4 hour</b> (1-3)                                                | 0.00             | 0.78             | 0%             | 0.68    | 56.55 (-51.58, 164.67)   | 1.02 | 0.31    |
| <b>LF-24 and 48 hour</b> (5, 7, 9)                                          | 0.00             | 1.55             | 0%             | 0.99    | 52.16 (-23.94, 128.25)   | 1.34 | 0.18    |
| <b>LF-2 and 4 hour</b> (1-3)                                                | 0.00             | 0.32             | 0%             | 0.85    | -28.08 (-157.67, 101.51) | 0.42 | 0.67    |
| <b>LF/HF-24 and 48 hour</b> (5, 7, 9)                                       | 0.00             | 4.16             | 0%             | 0.84    | -0.11 (-0.26, 0.03)      | 1.59 | 0.11    |
| <b>LF/HF-2 and 4 hour</b> (2, 3)                                            | 0.00             | 0.88             | 0%             | 0.35    | -0.42 (-0.94, 0.10)      | 1.59 | 0.11    |
| <b>SDNN-24 and 48 hour</b> (5, 7, 9)                                        | 0.00             | 1.03             | 0%             | 1.00    | 6.09 (1.25, 10.94)       | 2.46 | 0.01    |
| <b>SDNN-2 and 4 hour</b> (1-3)                                              | 0.00             | 0.89             | 0%             | 0.64    | -0.44 (-5.74, 4.85)      | 0.16 | 0.87    |
| <b>pNN50-24 and 48 hour</b> (5, 7, 9)                                       | 0.00             | 5.78             | 0%             | 0.67    | 1.10 (-0.50, 2.70)       | 1.35 | 0.18    |
| <b>pNN50-2 and 4 hour</b> (1, 3)                                            | 0.00             | 0.10             | 0%             | 0.76    | 1.69 (-2.73, 6.10)       | 0.75 | 0.45    |
| <b>HR-24 and 48 hour</b> (4, 5, 7, 9)                                       | 0.00             | 4.80             | 0%             | 0.94    | 0.16 (-1.06, 1.38)       | 0.26 | 0.80    |
| <b>HR-2 and 4 hour</b> (1, 3)                                               | 0.00             | 0.47             | 0%             | 0.49    | 0.09 (-2.63, 2.80)       | 0.06 | 0.95    |



**Table S7.** Meta-analyses – excluding studies one-by-one.

| Studies included  | Health outcomes | Heterogeneity    |                  |                |             | Test for overall effect     |                     |             |
|-------------------|-----------------|------------------|------------------|----------------|-------------|-----------------------------|---------------------|-------------|
|                   |                 | Tau <sup>2</sup> | Chi <sup>2</sup> | I <sup>2</sup> | p-value     | Overall effect size         | Z                   | p-value     |
| (1-5, 7, 8)       | SBP             | 0.00             | 4.64             | 0%             | 0.95        | -0.67 (-2.02, 0.68)         | 0.97                | 0.33        |
| (1-3, 5, 7-9)     |                 | 0.00             | 6.60             | 0%             | 0.92        | -0.95 (-2.40, 0.50)         | 1.29                | 0.20        |
| (1-4, 7-9)        |                 | 0.00             | 6.96             | 0%             | 0.94        | -0.69 (-2.03, 0.64)         | 1.02                | 0.31        |
| (1, 2, 4, 5, 7-9) |                 | 0.00             | 7.14             | 0%             | 0.93        | -0.76 (-2.09, 0.57)         | 1.12                | 0.26        |
| (1, 3-5, 7-9)     |                 | 0.00             | 7.06             | 0%             | 0.93        | -0.84 (-2.17, 0.49)         | 1.23                | 0.22        |
| (1-5, 7, 9)       |                 | 0.00             | 4.50             | 0%             | 0.97        | -0.50 (-1.83, 0.82)         | 0.75                | 0.45        |
| (2-5, 7-9)        |                 | 0.00             | 6.88             | 0%             | 0.94        | -0.69 (-2.01, 0.64)         | 1.01                | 0.31        |
| (1-5, 8, 9)       |                 | 0.00             | 5.56             | 0%             | 0.94        | -1.28 (-2.81, 0.24)         | 1.65                | 0.10        |
| (1-5, 7, 8)       |                 | DBP              | 0.00             | 2.75           | 0%          | 0.99                        | -0.63 (-1.57, 0.31) | 1.31        |
| (1-3, 5, 7-9)     | 0.00            |                  | 3.21             | 0%             | 1.00        | -0.40 (-1.45, 0.66)         | 0.74                | 0.46        |
| (1-4, 7-9)        | 0.00            |                  | 3.89             | 0%             | 1.00        | -0.46 (-1.38, 0.46)         | 0.98                | 0.33        |
| (1, 2, 4, 5, 7-9) | 0.00            |                  | 3.89             | 0%             | 1.00        | -0.52 (-1.43, 0.38)         | 1.13                | 0.26        |
| (1, 3-5, 7-9)     | 0.00            |                  | 3.94             | 0%             | 1.00        | -0.49 (-1.40, 0.41)         | 1.07                | 0.29        |
| (1-5, 7, 9)       | 0.00            |                  | 3.29             | 0%             | 0.99        | -0.38 (-1.30, 0.54)         | 0.80                | 0.42        |
| (2-5, 7-9)        | 0.00            |                  | 3.21             | 0%             | 1.00        | -0.40 (-1.30, 0.51)         | 0.86                | 0.39        |
| (1-5, 8, 9)       | 0.00            |                  | 3.05             | 0%             | 1.00        | -0.68 (-1.64, 0.28)         | 1.39                | 0.17        |
| (3, 4, 7, 8)      | MAP             |                  | 0.00             | 2.86           | 0%          | 0.94                        | -1.06 (-2.24, 0.11) | 1.77        |
| (3, 7-9)          |                 | <b>0.00</b>      | <b>3.03</b>      | <b>0%</b>      | <b>0.98</b> | <b>-1.46 (-2.77, -0.14)</b> | <b>2.17</b>         | <b>0.03</b> |
| (4, 7-9)          |                 | 0.00             | 3.01             | 0%             | 0.99        | -0.82 (-1.99, 0.34)         | 1.38                | 0.17        |
| (3, 4, 7, 9)      |                 | 0.00             | 2.99             | 0%             | 0.96        | -0.85 (-1.99, 0.29)         | 1.46                | 0.14        |
| (3, 4, 8, 9)      |                 | <b>0.00</b>      | <b>3.73</b>      | <b>0%</b>      | <b>0.93</b> | <b>-1.22 (-2.44, 0.00)</b>  | <b>1.96</b>         | <b>0.05</b> |
| (1-3, 5, 7, 8)    | HF              | 0.00             | 3.64             | 0%             | 0.93        | 39.67 (-6.50, 85.83)        | 1.68                | 0.09        |
| (1-3, 7-9)        |                 | 0.00             | 3.22             | 0%             | 0.98        | 36.27 (-2.36, 74.89)        | 1.84                | 0.07        |
| (1, 2, 5, 7-9)    |                 | 0.00             | 3.04             | 0%             | 0.98        | 35.52 (-2.36, 74.89)        | 1.80                | 0.07        |
| (1, 3, 5, 7-9)    |                 | <b>0.00</b>      | <b>3.47</b>      | <b>0%</b>      | <b>0.97</b> | <b>38.58 (0.70, 76.46)</b>  | <b>2.00</b>         | <b>0.05</b> |
| (1-3, 5, 8, 9)    |                 | 0.00             | 1.26             | 0%             | 0.94        | 47.49 (-6.58, 101.56)       | 1.72                | 0.09        |
| (2, 3, 5, 7-9)    |                 | <b>0.00</b>      | <b>3.60</b>      | <b>0%</b>      | <b>0.96</b> | <b>40.45 (1.10, 79.80)</b>  | <b>2.01</b>         | <b>0.04</b> |
| (1-3, 5, 7)       | LF              | 0.00             | 2.17             | 0%             | 0.99        | 18.94 (-52.34, 90.22)       | 0.52                | 0.60        |
| (1-3, 7, 9)       |                 | 0.00             | 2.93             | 0%             | 0.98        | 30.37 (-36.59, 97.33)       | 0.89                | 0.37        |
| (1, 2, 5, 7, 9)   |                 | 0.00             | 2.96             | 0%             | 0.98        | 31.55 (-36.42, 99.52)       | 0.91                | 0.36        |
| (1, 3, 5, 7, 9)   |                 | 0.00             | 2.91             | 0%             | 0.98        | 31.81 (-33.85, 97.46)       | 0.95                | 0.34        |
| (1-3, 5, 9)       |                 | 0.00             | 1.81             | 0%             | 0.87        | 23.96 (-74.01, 121.93)      | 0.48                | 0.63        |
| (2, 3, 5, 7, 9)   |                 | 0.00             | 1.62             | 0%             | 1.00        | 50.17 (-22.63, 122.96)      | 1.35                | 0.18        |
| (2, 3, 5, 7)      | LF/HF           | <b>0.00</b>      | <b>5.41</b>      | <b>0%</b>      | <b>0.71</b> | <b>-0.15 (-0.29, -0.01)</b> | <b>2.13</b>         | <b>0.03</b> |
| (2, 3, 5, 7, 9)   |                 | 0.00             | 5.82             | 0%             | 0.76        | -0.20 (-0.43, 0.03)         | 1.72                | 0.09        |
| (2, 5, 7, 9)      |                 | 0.00             | 4.22             | 0%             | 0.90        | -0.12 (-0.26, 0.02)         | 1.67                | 0.09        |
| (3, 5, 7, 9)      |                 | 0.00             | 6.26             | 0%             | 0.71        | -0.13 (-0.27, 0.01)         | 1.88                | 0.06        |
| (2, 3, 5, 9)      |                 | 0.00             | 2.95             | 0%             | 0.57        | -0.11 (-0.27, 0.04)         | 1.41                | 0.16        |
| (1-3, 5, 7)       | SDNN            | 0.00             | 4.26             | 0%             | 0.89        | 2.36 (-1.72, 6.44)          | 1.13                | 0.26        |
| (1-3, 7, 9)       |                 | 0.00             | 5.10             | 0%             | 0.88        | 3.07 (-0.56, 6.71)          | 1.66                | 0.10        |
| (1, 2, 5, 7, 9)   |                 | 0.00             | 5.03             | 0%             | 0.89        | 3.37 (-0.59, 7.32)          | 1.67                | 0.10        |
| (1, 3, 5, 7, 9)   |                 | 0.00             | 5.11             | 0%             | 0.88        | 3.14 (-0.51, 6.80)          | 1.68                | 0.09        |
| (1-3, 5, 9)       |                 | 0.00             | 2.94             | 0%             | 0.71        | 1.72 (-2.50, 5.93)          | 0.80                | 0.42        |
| (2, 3, 5, 7, 9)   |                 | <b>0.00</b>      | <b>1.81</b>      | <b>0%</b>      | <b>1.00</b> | <b>4.91 (0.84, 8.97)</b>    | <b>2.37</b>         | <b>0.02</b> |
| (1, 3, 5, 7)      | rMSSD           | 0.00             | 3.62             | 0%             | 0.89        | 1.28 (-0.88, 3.44)          | 1.16                | 0.25        |
| (1, 3, 7, 9)      |                 | 0.00             | 3.38             | 0%             | 0.95        | 1.34 (-0.67, 3.34)          | 1.31                | 0.19        |
| (1, 5, 7, 9)      |                 | 0.00             | 3.73             | 0%             | 0.93        | 1.40 (-0.62, 3.42)          | 1.36                | 0.17        |
| (1, 3, 5, 9)      |                 | 0.00             | 1.71             | 0%             | 0.79        | 2.14 (-1.03, 5.32)          | 1.32                | 0.19        |
| (3, 5, 7, 9)      |                 | 0.00             | 2.81             | 0%             | 0.97        | 1.75 (-0.24, 3.74)          | 1.72                | 0.09        |
| (1, 3, 5, 7)      | pNN50           | <b>0.00</b>      | <b>3.13</b>      | <b>0%</b>      | <b>0.93</b> | <b>1.85 (0.07, 3.64)</b>    | <b>2.04</b>         | <b>0.04</b> |



## References

1. Han B, Zhao R, Zhang N, Xu J, Zhang L, Yang W, et al. Acute cardiovascular effects of traffic-related air pollution (TRAP) exposure in healthy adults: A randomized, blinded, crossover intervention study. *Environmental Pollution*. 2021;117583.
2. Morishita M, Wang L, Speth K, Zhou N, Bard RL, Li F, et al. Acute Blood Pressure and Cardiovascular Effects of Near-Roadway Exposures With and Without N95 Respirators. *American journal of hypertension*. 2019;32(11):1054-65.
3. Yang X, Jia X, Dong W, Wu S, Miller M, Hu D, et al. Cardiovascular benefits of reducing personal exposure to traffic-related noise and particulate air pollution: A randomized crossover study in the Beijing subway system. *Indoor Air*. 2018;28(5):777-86.
4. Langrish JP, Li X, Wang S, Lee MM, Barnes GD, Miller MR, et al. Reducing personal exposure to particulate air pollution improves cardiovascular health in patients with coronary heart disease. *Environmental health perspectives*. 2012;120(3):367-72.
5. Shi J, Lin Z, Chen R, Wang C, Yang C, Cai J, et al. Cardiovascular benefits of wearing particulate-filtering respirators: a randomized crossover trial. *Environmental health perspectives*. 2017;125(2):175-80.
6. Langrish JP, Mills NL, Chan JK, Leseman DL, Aitken RJ, Fokkens PH, et al. Beneficial cardiovascular effects of reducing exposure to particulate air pollution with a simple facemask. *Particle and fibre toxicology*. 2009;6(1):1-9.
7. Faridi S, Brook RD, Hassanvand MS, Nodehi RN, Shamsipour M, Tajdini M, et al. Cardiovascular health effects of wearing a particulate-filtering respirator to reduce particulate matter exposure: a randomized crossover trial. *Journal of Human Hypertension*. 2021:1-11.
8. Lim YH, Kim W, Choi Y, Kim HC, Na G, Kim HR, et al. Effects of Particulate Respirator Use on Cardiopulmonary Function in Elderly Women: a Quasi-Experimental Study. *Journal of Korean medical science*. 2020;35(10):e64.
9. Langrish JP, Mills NL, Chan JK, Leseman DL, Aitken RJ, Fokkens PH, et al. Beneficial cardiovascular effects of reducing exposure to particulate air pollution with a simple facemask. *Particle and fibre toxicology*. 2009;6(1):8.
10. Cherrie JW, Apsley A, Cowie H, Steinle S, Mueller W, Lin C, et al. Effectiveness of face masks used to protect Beijing residents against particulate air pollution. *Occup Environ Med*. 2018;75(6):446-52.
11. Pacitto A, Amato F, Salmatonidis A, Moreno T, Alastuey A, Reche C, et al. Effectiveness of commercial face masks to reduce personal PM exposure. *Science of The Total Environment*. 2019;650:1582-90.
12. Faridi S, Nodehi RN, Sadeghian S, Tajdini M, Hoseini M, Yunesian M, et al. Can respirator face masks in a developing country reduce exposure to ambient particulate matter? *Journal of Exposure Science & Environmental Epidemiology*. 2020:1-12.
13. Guan T, Hu S, Han Y, Wang R, Zhu Q, Hu Y, et al. The effects of facemasks on airway inflammation and endothelial dysfunction in healthy young adults: a double-blind, randomized, controlled crossover study. *Particle and fibre toxicology*. 2018;15(1):1-12.
14. Shen H, Liu B, Chen Y, Zhu X, Yun X, Meng W, et al. Individual and population level protection from particulate matter exposure by wearing facemasks. *Environment International*. 2021;146:106026.
